# Supplementary material for: Iron Limitation Restores Autophagy and Increases Lifespan in the Yeast Model of Niemann–Pick Type C1
Source: Int J Mol Sci. 2023 Mar 25;24(7):6221. doi: 10.3390/ijms24076221 (PMC10094029; doi:10.3390/ijms24076221)
Supplement: Supplementary file 1 [file ijms-24-06221-s001.zip]

Archive with 4 entries (4 files):
- Supplementary figures.pdf
- Table S1.xlsx
- Table S2.xlsx
- Table S3.xlsx
