# Supplementary material for: Iron Limitation Restores Autophagy and Increases Lifespan in the Yeast Model of Niemann–Pick Type C1
Source: Int J Mol Sci. 2023 Mar 25;24(7):6221. doi: 10.3390/ijms24076221 (PMC10094029; doi:10.3390/ijms24076221)
Supplement: Supplementary file 1 [file ijms-24-06221-s001.zip › Table S1.xlsx]

## Sheet: Table S1 - Protein levels
Levels of vacuolar membrane proteins in wild type and ncr1∆ samples
* - proteins only detected in ncr1∆ samples; ** - protein only detected in wild type samples
Accession	Gene Symbol	Gene ID	Abundances (normalized) wild type				Abundances (normalized) ncr1∆				Ratio ncr1∆/wt	p-value (Student's t-test)
			Sample 1	Sample 2	Sample 3	Mean	Sample 1	Sample 2	Sample 3	Mean
P32386	YBT1	D6VXW0; P32386; Q07882; sce:YLL048C	9.73025e+09	1.03416e+10	1.15728e+10	1.05482e+10	8.21425e+09	8.62447e+09	7.79906e+09	8.21259e+09	0.778578	0.0168764
P39109	YCF1	D6VSB9; P39109; Q03905; sce:YDR135C	6.09738e+09	6.99151e+09	7.6366e+09	6.9085e+09	5.92762e+09	6.16628e+09	5.66841e+09	5.92077e+09	0.857028	0.102875
P39968	VAC8	D3DLN6; P39968; Q549T0; sce:YEL013W	5.62348e+09	4.10075e+09	6.4745e+09	5.39958e+09	4.2186e+09	5.07655e+09	4.06655e+09	4.4539e+09	0.824862	0.282506
P32563	VPH1	D6W2X0; P32563; sce:YOR270C	1.5716e+10	1.72424e+10	1.9832e+10	1.75968e+10	1.73117e+10	1.68835e+10	1.6266e+10	1.68204e+10	0.955878	0.564901
P35169	TOR1	D6VWN7; P35169; sce:YJR066W	6.11227e+08	6.27527e+08	9.66348e+08	7.35034e+08	5.41589e+08	3.90922e+08	9.6815e+08	6.33554e+08	0.861938	0.651221
P38929	PMC1	D6VUD2; P38929; sce:YGL006W	2.31728e+09	2.64719e+09	2.76493e+09	2.57647e+09	3.07544e+09	3.10461e+09	3.21392e+09	3.13132e+09	1.21536	0.0168101
Q02725	VTC3	D6W3Z3; Q02725; sce:YPL019C	3.47906e+09	1.91907e+09	1.44814e+09	2.28209e+09	1.43777e+09	1.39415e+09	1.47859e+09	1.43684e+09	0.629616	0.302245
P16140	VMA2	D6VQC4; P16140; P32123; sce:YBR127C	1.09171e+09	2.1039e+09	7.40807e+08	1.31214e+09	2.55953e+09	2.90507e+09	3.30897e+09	2.92452e+09	2.22882	0.0252047
P17255	VMA1	D6VRG7; O74301; P17255; Q9Y7W5; sce:YDL185W	1.18349e+09	1.76601e+09	6.35301e+08	1.19493e+09	1.07188e+09	1.58673e+09	1.50922e+09	1.38928e+09	1.16264	0.621392
P11491	PHO8	D6VTA4; E9P949; P11491; Q03374; sce:YDR481C	2.9092e+09	2.75402e+09	2.43061e+09	2.69794e+09	2.81251e+09	2.80024e+09	2.42945e+09	2.68074e+09	0.993622	0.931783
P14772	BPT1	D6VXY7; P14772; sce:YLL015W	1.20186e+09	1.25596e+09	1.79885e+09	1.41889e+09	1.21393e+09	1.40426e+09	1.44539e+09	1.35453e+09	0.954637	0.767621
P25371	ADP1	D6VR20; P25371; sce:YCR011C	1.50905e+09	1.57083e+09	2.10126e+09	1.72705e+09	2.0169e+09	2.49877e+09	2.29271e+09	2.26946e+09	1.31407	0.081422
Q12697	YPK9	D6W2Y9; Q12697; sce:YOR291W	1.18492e+09	1.43171e+09	1.74693e+09	1.45452e+09	8.8834e+08	8.01759e+08	1.2638e+09	9.84635e+08	0.676949	0.0949954
P22855	AMS1	D6VTZ5; P22855; sce:YGL156W	1.64372e+08	2.79378e+08	8.89403e+07	1.77563e+08	1.98184e+09	2.40179e+09	2.86999e+09	2.41787e+09	13.617	0.00103321
P18962	DAP2	D3DKX5; E9P957; P18962; sce:YHR028C	2.09589e+09	2.17897e+09	2.39149e+09	2.22212e+09	2.40297e+09	2.29485e+09	2.40137e+09	2.3664e+09	1.06493	0.203485
P32600	TOR2	D6VX00; P32600; sce:YKL203C	1.65252e+08	1.7065e+08	4.04045e+08	2.46649e+08	1.90451e+08	1.40659e+08	2.82675e+08	2.04595e+08	0.829498	0.661292
P27514	PHO91	D6W1I8; P27514; sce:YNR013C	1.68406e+09	1.34726e+09	1.11243e+09	1.38125e+09	1.08995e+09	1.22332e+09	8.50773e+08	1.05468e+09	0.763568	0.175248
P53925	YNL115C	B0KZS0; D6W167; P53925; Q6B2V3; sce:YNL115C	1.18492e+09	1.42232e+09	1.29267e+09	1.29997e+09	2.82588e+09	3.21103e+09	1.9535e+09	2.66347e+09	2.04888	0.022665
P47075	VTC4	D6VWG5; P47075; Q7Z872; Q86ZR4; sce:YJL012C	2.66983e+09	1.6829e+09	1.33142e+09	1.89472e+09	1.16104e+09	1.84923e+09	1.60512e+09	1.53847e+09	0.811977	0.471397
Q12324	YVC1	D6W2E9; Q08500; Q12324; Q7LGN3; sce:YOR087W	7.85506e+08	7.80185e+08	9.68224e+08	8.44638e+08	6.41863e+08	8.43284e+08	9.82903e+08	8.22683e+08	0.974007	0.859934
P20107	ZRC1	D6W070; P20107; sce:YMR243C	2.87872e+09	2.75468e+09	2.38445e+09	2.67262e+09	1.99491e+09	1.72699e+09	1.73047e+09	1.81746e+09	0.680028	0.00779325
P43585	VTC2	D6VTM5; P43585; sce:YFL004W	2.19128e+09	1.9361e+09	1.90618e+09	2.01119e+09	1.89752e+09	6.12378e+08	2.1526e+09	1.55417e+09	0.77276	0.439817
P40528	SYG1	D6VVN4; P40528; P40964; sce:YIL047C	6.46606e+08	5.14831e+08	3.74157e+08	5.11864e+08	5.37878e+08	6.41941e+08	5.85245e+08	5.88355e+08	1.14943	0.415126
P32366	VMA6	D6VZ81; P32366; sce:YLR447C	1.28113e+09	1.99227e+09	7.38601e+08	1.33733e+09	6.38886e+08	6.38524e+08	9.48281e+08	7.41897e+08	0.554759	0.189741
P42839	VNX1	D6W0M5; P42839; sce:YNL321W	6.58588e+08	6.54318e+08	5.01457e+08	6.04788e+08	6.62344e+08	6.94819e+08	6.64812e+08	6.73992e+08	1.11443	0.311275
P38873	KOG1	D3DLD4; P38873; sce:YHR186C	1.09851e+08	1.42392e+08	2.973e+08	1.83181e+08	3.27412e+08	1.85299e+08	2.94209e+08	2.68974e+08	1.46835	0.299389
P38225	FAT1	D6VQ41; O60021; P38225; Q86ZS3; sce:YBR041W	2.32673e+08	3.21807e+08	7.43179e+08	4.32553e+08	1.29118e+09	8.92407e+08	1.52051e+09	1.2347e+09	2.85445	0.029443
P38244	PFF1	D6VQ74; P38244; P38245; Q86ZS2; sce:YBR074W	1.70122e+09	1.78497e+09	2.05075e+09	1.84565e+09	3.81127e+09	3.27448e+09	3.04518e+09	3.37698e+09	1.8297	0.00361307
Q12296	MAM3	D6W207; Q12296; sce:YOL060C	5.93104e+08	3.9139e+08	5.94966e+08	5.26486e+08	4.6022e+08	5.80746e+08	6.6125e+08	5.67405e+08	1.07772	0.670602
P38966	VTC5	D6VS76; P38966; Q03192; sce:YDR089W	1.64772e+09	1.32588e+09	1.08456e+09	1.35272e+09	6.31516e+08	6.57798e+08	5.9249e+08	6.27268e+08	0.463708	0.0115329
P02994	TEF1; TEF2	D6VQB6; P02994; Q7Z7U8; Q7Z8Q8; Q7Z8Q9; sce:YBR118W; sce:YPR080W	1.18412e+09	9.0755e+08	1.24988e+09	1.11385e+09	1.86291e+09	1.38896e+09	1.22708e+09	1.49298e+09	1.34038	0.15656
Q06708	VAC14	D6VZ21; Q06708; sce:YLR386W	1.11044e+08	1.42837e+08	2.59146e+08	1.71009e+08	1.79679e+08	1.99997e+08	3.85816e+08	2.55164e+08	1.49211	0.34976
P21576	VPS1	D6VXT7; P21576; sce:YKR001C	2.88595e+08	2.36068e+08	3.99414e+08	3.08025e+08	2.53895e+08	2.77742e+08	2.57039e+08	2.62892e+08	0.853475	0.406698
P22219	VPS15	D6VQ98; P22219; sce:YBR097W	4.0072e+09	4.1516e+09	1.4855e+09	3.21477e+09	4.61784e+09	3.13311e+09	4.35096e+09	4.03397e+09	1.25482	0.449736
P38329	VHC1	D6VQN1; P38329; sce:YBR235W	3.28988e+08	3.12171e+08	2.59344e+08	3.00167e+08	8.78198e+08	5.67274e+08	7.10778e+08	7.1875e+08	2.3945	0.0105219
P39962	YCK3	D3DM29; P39962; sce:YER123W	6.36284e+08	5.22191e+08	4.81509e+08	5.46661e+08	1.70678e+08	2.76359e+08	2.12192e+08	2.19743e+08	0.401973	0.0041798
P53273		D6VUQ7; P53273; sce:YGR125W	5.89544e+08	4.2554e+08	4.145e+08	4.76528e+08	3.12537e+08	3.19416e+08	2.95378e+08	3.0911e+08	0.648672	0.0955481
P37296	STV1	D6VZM9; P37296; sce:YMR054W	2.24328e+08	2.65201e+08	2.98431e+08	2.62653e+08	2.58428e+08	2.88932e+08	2.61367e+08	2.69575e+08	1.02635	0.783243
P12868	PEP5	D6W057; P12868; sce:YMR231W	1.40639e+08	1.20371e+08	2.17272e+08	1.59428e+08	1.27231e+08	1.41033e+08	1.61003e+08	1.43089e+08	0.897516	0.627045
P06780	RHO1	D6W4G6; P06780; sce:YPR165W	1.3386e+09	1.06028e+09	9.60248e+08	1.11971e+09	1.00217e+09	1.11032e+09	1.3974e+09	1.16996e+09	1.04488	0.773845
P47818	CCC1	D6VYM0; P47818; sce:YLR220W	1.45533e+09	1.69844e+09	1.46263e+09	1.5388e+09	1.20622e+09	1.70028e+09	1.03617e+09	1.31423e+09	0.854058	0.354371
P43561	FET5	D6VTI9; P43561; sce:YFL041W	1.23251e+09	1.57185e+09	9.16307e+08	1.24022e+09	1.85906e+09	1.83467e+09	2.10905e+09	1.93426e+09	1.55961	0.0291838
P10592	SSA2	D6VXY0; P10592; sce:YLL024C	3.4584e+08	3.14036e+08	2.36393e+08	2.98757e+08	4.16983e+08	3.34451e+08	3.28241e+08	3.59892e+08	1.20463	0.230807
P47082	AVT1	D6VWH5; P47082; sce:YJR001W	3.12338e+08	3.0153e+08	3.39805e+08	3.17891e+08	2.46756e+08	1.82868e+08	2.8714e+08	2.38921e+08	0.751583	0.0715427
Q12078	SMF3	D6VY36; Q12078; sce:YLR034C	1.07009e+09	1.08888e+09	1.15952e+09	1.10616e+09	3.11944e+09	2.41539e+09	2.09682e+09	2.54388e+09	2.29974	0.0090393
P41807	VMA13	D6W446; P41807; sce:YPR036W	1.14138e+08	2.03084e+08	1.53078e+08	1.56767e+08	1.4561e+08	1.23721e+08	2.12039e+08	1.60457e+08	1.02354	0.925319
P38310	FTH1	D6VQK4; P38310; Q9URQ1; sce:YBR207W	2.41387e+08	2.59641e+08	2.51107e+08	2.50712e+08	5.38033e+08	4.43681e+08	5.66591e+08	5.16102e+08	2.05855	0.0174351
P43555	EMP47	D6VTI2; P43555; sce:YFL048C	2.57071e+08	2.94524e+08	1.73139e+08	2.41578e+08	2.08812e+08	3.18569e+08	3.02669e+08	2.76683e+08	1.14531	0.518184
Q07468	VAM6	D6VRS2; Q07468; sce:YDL077C	1.03879e+08	8.76606e+07	1.89074e+08	1.26871e+08	9.95055e+07	1.172e+08	1.40813e+08	1.19173e+08	0.93932	0.830264
P10591	SSA1	D6VPL2; P10591; sce:YAL005C	2.52187e+07	2.17767e+07	1.00557e+07	1.9017e+07	5.14986e+07	4.98161e+07	4.0342e+07	4.72189e+07	2.48298	0.00804271
P19524	MYO2	D6W323; P19524; sce:YOR326W	1.89865e+08	1.49753e+08	1.17211e+08	1.52276e+08	6.98753e+07	6.54427e+07	8.91102e+07	7.48094e+07	0.491274	0.0252477
P27809	KRE2	D6VTA6; P27809; sce:YDR483W	2.42996e+08	2.19908e+08	1.26908e+08	1.96604e+08	9.74657e+07	1.01402e+08	1.02915e+08	1.00594e+08	0.51166	0.113428
P53134	YGL114W	D6VU33; P53134; sce:YGL114W	2.25335e+08	2.30798e+08	2.27218e+08	2.27784e+08	3.18306e+08	3.88587e+08	2.80237e+08	3.29043e+08	1.44454	0.0333215
Q04119	PPN1	D6VT77; Q04119; sce:YDR452W	2.46379e+08	3.11544e+08	5.26424e+07	2.03522e+08	1.93026e+08	2.66349e+08	3.97029e+08	2.85468e+08	1.40264	0.450103
Q04602	VBA4	D6VSA4; Q04602; sce:YDR119W	4.84621e+08	3.59142e+08	3.08697e+08	3.84153e+08	2.68732e+08	2.62851e+08	2.95193e+08	2.75592e+08	0.7174	0.111053
P27614	CPS1	D6VW16; P27614; sce:YJL172W	9.858e+08	8.77229e+08	2.29057e+08	6.97362e+08	1.27915e+09	1.40444e+09	9.74176e+08	1.21925e+09	1.74838	0.123924
P34240	ZRT3	D6VX25; P34240; sce:YKL175W	2.72756e+08	2.71007e+08	3.94099e+08	3.12621e+08	2.00678e+08	2.77631e+08	3.3373e+08	2.7068e+08	0.865842	0.496257
P35724	MNR2	D6VXM3; P35724; sce:YKL064W	1.66268e+08	1.56832e+08	1.35798e+08	1.52966e+08	1.15456e+08	1.5862e+08	1.16603e+08	1.30227e+08	0.851342	0.24768
Q06538	CSC1	D6VYN9; Q06538; sce:YLR241W	5.62276e+08	5.79794e+08	6.53399e+08	5.9849e+08	3.90191e+08	4.85367e+08	5.5063e+08	4.75396e+08	0.794326	0.0860476
P39925	AFG3	D3DLR5; P39925; sce:YER017C	2.23147e+08	1.86034e+08	1.10981e+08	1.73387e+08	8.2002e+07	7.47074e+07	1.05753e+08	8.74873e+07	0.504578	0.0664375
P31412	VMA5	D6VXK7; P31412; sce:YKL080W	4.98133e+07	1.35832e+08	4.8775e+07	7.81401e+07	4.71748e+07	1.10452e+08	2.42713e+08	1.33447e+08	1.70779	0.439037
Q05521	DPP1	D6VSR4; Q05521; sce:YDR284C	5.74656e+08	5.87213e+08	7.57979e+08	6.39949e+08	6.30627e+08	4.40382e+08	5.63866e+08	5.44958e+08	0.851565	0.307266
Q12255	NYV1	D6VY93; Q12255; sce:YLR093C	4.50451e+08	3.46095e+08	4.06969e+08	4.01172e+08	1.45898e+08	1.51579e+08	1.90631e+08	1.62703e+08	0.405569	0.00202864
Q03823		D6VZY2; Q03823; sce:YMR160W	1.0101e+08	9.4716e+07	1.18747e+08	1.04824e+08	1.37138e+08	1.07907e+08	1.47734e+08	1.30927e+08	1.24901	0.133897
Q12013	AKR2	D6W2A0; Q12013; sce:YOR034C	1.54714e+08	9.13064e+07	1.68426e+08	1.38149e+08	6.00153e+07	6.92599e+07	8.59037e+07	7.17263e+07	0.519196	0.0561459
Q02205	MEH1	D6VX73; Q02205; sce:YKR007W	9.66802e+07	4.7768e+07	1.24305e+08	8.95845e+07	6.37755e+07	3.72582e+07	2.3017e+07	4.13502e+07	0.461578	0.129996
Q03441	RMD1	D6VRY7; Q03441; Q05210; sce:YDL001W	2.2639e+08	2.24599e+08	2.54672e+08	2.3522e+08	1.84201e+08	2.08373e+08	2.52925e+08	2.15166e+08	0.914744	0.420496
Q12209	FRE8	D6VY49; Q12209; sce:YLR047C	1.35899e+08	1.27469e+08	1.09863e+08	1.2441e+08	2.19902e+08	1.63107e+08	2.75857e+08	2.19622e+08	1.7653	0.0465252
Q99385	VCX1	D6VRM2; O13580; O13581; Q99385; sce:YDL128W	8.52294e+08	9.21412e+08	1.03334e+09	9.35683e+08	6.86315e+08	7.70831e+08	8.7332e+08	7.76822e+08	0.830219	0.10329
Q04338	VTI1	D6W022; Q04338; sce:YMR197C	6.89683e+08	5.49637e+08	5.27473e+08	5.88931e+08	4.29558e+08	6.70468e+08	3.16647e+08	4.72224e+08	0.801833	0.371458
P06105	SCP160	D6VWA3; P06105; sce:YJL080C	1.05673e+08	6.76014e+07	8.03571e+07	8.45439e+07	5.56233e+07	4.21395e+07	4.0926e+07	4.62296e+07	0.546811	0.0343049
Q04301	VBA1	D6VZR1; Q04301; sce:YMR088C	2.33312e+08	2.64188e+08	2.48263e+08	2.48588e+08	2.25382e+08	1.94699e+08	2.31794e+08	2.17292e+08	0.874105	0.0972131
P46989	ATG27	D6VW11; P46989; Q86ZR9; sce:YJL178C	1.50848e+09	1.48205e+09	1.9534e+09	1.64798e+09	1.5245e+09	1.40052e+09	1.06672e+09	1.33058e+09	0.807402	0.196647
P22203	VMA4	D6W328; P22203; sce:YOR332W	2.76937e+08	4.50576e+08	1.60375e+08	2.95963e+08	3.54569e+08	4.65416e+08	3.978e+08	4.05928e+08	1.37155	0.2901
P25351	YCR023C	D6VR32; P25351; Q8NKJ7; sce:YCR023C	1.64663e+08	1.94076e+08	1.86515e+08	1.81751e+08	2.33388e+08	3.18632e+08	2.19058e+08	2.57026e+08	1.41416	0.0802493
P22543	VPS34	D6VYN8; P22543; sce:YLR240W	7.49346e+07	7.34562e+07	9.46312e+07	8.10073e+07	7.81375e+07	7.77817e+07	9.65984e+07	8.41725e+07	1.03907	0.748924
P32798	COT1	D6W314; P32798; sce:YOR316C	6.4183e+08	5.30787e+08	6.09589e+08	5.94069e+08	7.88015e+08	6.60792e+08	8.18539e+08	7.55782e+08	1.27221	0.0506022
P38164	SEA4	D6VPP9; P38164; Q86ZS4; sce:YBL104C	3.44351e+07	2.95486e+07	7.6118e+07	4.67005e+07	1.16816e+08	7.37331e+07	5.95011e+07	8.33502e+07	1.78478	0.181688
P25568	ATG22	D6VQX7; P25568; sce:YCL038C	2.03736e+08	2.23597e+08	2.00042e+08	2.09125e+08	2.58108e+08	2.76832e+08	2.89989e+08	2.74976e+08	1.31489	0.00504312
P53285	VPS62	D6VUS1; P53285; sce:YGR141W	5.309e+08	4.0338e+08	4.3426e+08	4.5618e+08	4.7665e+08	3.57943e+08	3.46078e+08	3.93557e+08	0.862724	0.331242
Q12256	TPO4	D6W2X3; Q12256; sce:YOR273C	2.07303e+08	2.60252e+08	1.17108e+08	1.94888e+08	2.75899e+08	2.9462e+08	2.20016e+08	2.63512e+08	1.35212	0.221372
P38959	VPS41	D6VS67; P38959; P87334; Q12011; sce:YDR080W	6.27293e+07	5.82952e+07	8.11997e+07	6.74081e+07	7.19386e+07	7.33726e+07	6.91997e+07	7.15036e+07	1.06076	0.620271
P32602	SEC17	D6VPU9; P32602; sce:YBL050W	1.05115e+08	6.8805e+07	7.08726e+07	8.15976e+07	1.71325e+08	1.5946e+08	1.22124e+08	1.5097e+08	1.85017	0.0214954
Q04991	FMP42	D6W046; Q04991; sce:YMR221C	8.64336e+08	1.01365e+09	8.81991e+08	9.19993e+08	1.10215e+09	1.33391e+09	6.98689e+08	1.04492e+09	1.13579	0.549723
P27801	PEP3	D6VYE3; P27801; sce:YLR148W	9.32311e+07	1.07874e+08	1.88951e+08	1.30019e+08	8.67475e+07	1.02813e+08	1.20382e+08	1.03314e+08	0.794611	0.441805
Q03516	RSN1	D6W092; Q03516; sce:YMR266W	4.58381e+08	4.06569e+08	1.23091e+08	3.29347e+08	2.06363e+08	1.19054e+08	2.12848e+08	1.79421e+08	0.544779	0.239215
P32939	YPT7	D6VZH4; P32939; sce:YML001W	1.28777e+09	1.41746e+09	1.82567e+09	1.5103e+09	1.32362e+09	1.79254e+09	1.52716e+09	1.54777e+09	1.02481	0.867934
Q07895		D6VY03; Q07895; sce:YLR001C	2.81648e+08	3.33741e+08	4.896e+08	3.68329e+08	3.6347e+08	2.76428e+08	4.50619e+08	3.63506e+08	0.986904	0.954922
Q06247		D6VYH7; Q06247; sce:YLR173W	1.13176e+08	1.24247e+08	1.3466e+08	1.24028e+08	1.35352e+08	1.35392e+08	1.28969e+08	1.33238e+08	1.07426	0.233004
Q08227	INP54	D6W202; Q08227; sce:YOL065C	2.29039e+08	2.11603e+08	1.60796e+08	2.00479e+08	2.04532e+08	1.97289e+08	2.51817e+08	2.17879e+08	1.08679	0.549736
P32610	VMA8	D3DLJ9; P32610; sce:YEL051W	1.31748e+08	1.10326e+08	7.5766e+07	1.05947e+08	1.01051e+08	1.1654e+08	1.32637e+08	1.16743e+08	1.1019	0.594365
P36018	YPT52	D6VX79; P36018; sce:YKR014C	1.82789e+08	1.99745e+08	1.66996e+08	1.83176e+08	1.40549e+08	1.13075e+08	1.27064e+08	1.26896e+08	0.692752	0.0103374
Q12407		D6VRF5; Q12407; sce:YDL199C	6.48929e+07	8.23466e+07	6.27411e+07	6.99935e+07	6.83272e+07	6.4486e+07	6.07436e+07	6.45189e+07	0.921784	0.452344
Q03308	VPS16	D6W3W9; Q03078; Q03308; sce:YPL045W	5.25643e+07	4.05124e+07	7.25437e+07	5.52068e+07	3.69507e+07	2.99221e+07	4.45123e+07	3.71284e+07	0.672532	0.152445
Q12241	VAM3	D6W2G5; Q12241; sce:YOR106W	1.82461e+08	9.46772e+07	1.25058e+08	1.34066e+08	4.58296e+07	5.03426e+07	5.66956e+07	5.09559e+07	0.380082	0.0327413
Q07824	TPO1	D6VXX6; Q07824; sce:YLL028W	1.32758e+08	1.37551e+08	3.63823e+07	1.0223e+08	1.11362e+08	8.56959e+07	1.71729e+08	1.22929e+08	1.20247	0.645419
Q12301	YDL180W	D6VRH2; Q12301; sce:YDL180W	9.80664e+07	8.03345e+07	8.21233e+07	8.68414e+07	4.72337e+07	6.06556e+07	5.51951e+07	5.43615e+07	0.625986	0.00903688
P38130	KTR3	D6VQK3; E9P931; P38130; sce:YBR205W	2.24419e+08	2.0558e+08	9.49919e+07	1.74997e+08	1.96739e+08	2.11629e+08	2.22224e+08	2.10197e+08	1.20115	0.476511
P34756	FAB1	D6VTQ0; P34756; sce:YFR019W	1.71911e+07	2.30227e+07	3.58425e+07	2.53521e+07	1.54083e+07	1.73023e+07	2.40971e+07	1.89359e+07	0.746916	0.352761
P40482	SEC24	D6VVH8; P40482; sce:YIL109C	4.22321e+07	5.05106e+07	5.72412e+07	4.99946e+07	8.02193e+07	4.0057e+07	5.80458e+07	5.94407e+07	1.18894	0.48861
P33311	MDL2	D6W3A0; P33311; Q08983; sce:YPL270W	1.2681e+08	9.16735e+07	4.81654e+07	8.8883e+07	1.85329e+07	1.76971e+07	3.94565e+07	2.52288e+07	0.283843	0.0557595
P42951	LSB6	D6VW84; P42951; sce:YJL100W	7.44403e+07	6.83735e+07	6.95303e+07	7.07814e+07	9.44489e+07	1.11529e+08	1.00213e+08	1.02064e+08	1.44196	0.00426749
P32912	VAM7	D6VTU3; P32912; sce:YGL212W	1.6129e+08	1.22589e+08	1.00302e+08	1.2806e+08	1.39551e+08	1.50857e+08	7.72409e+07	1.22549e+08	0.956967	0.858568
Q12473	FRE6	D6VXV7; Q12473; sce:YLL051C	1.3251e+08	1.16852e+08	1.62875e+08	1.37412e+08	2.40637e+08	1.39734e+08	2.23283e+08	2.01218e+08	1.46434	0.133386
P25356	BPH1	D6VR42; P25356; Q02396; Q07348; sce:YCR032W	3.45013e+07	3.11508e+07	4.15976e+07	3.57499e+07	4.20411e+07	3.402e+07	9.41803e+06	2.84931e+07	0.79701	0.519428
P32802	EMP70	D6VY83; P32802; Q12101; sce:YLR083C	1.09655e+08	1.12569e+08	6.94577e+07	9.72272e+07	3.0132e+07	2.46182e+07	3.52998e+07	3.00167e+07	0.308727	0.0350299
Q12003	ENV7	D6W3D4; Q12003; Q7LGU7; sce:YPL236C	6.89194e+07	8.0487e+07	1.04966e+08	8.47908e+07	8.66971e+07	7.6434e+07	1.26372e+08	9.65009e+07	1.13811	0.56249
Q02948	VPS30	D6W3P7; Q02948; sce:YPL120W	3.83425e+07	3.49264e+07	5.47889e+07	4.26859e+07	6.4862e+07	7.49075e+07	6.36772e+07	6.78156e+07	1.58871	0.0239307
P32343	SSH4	D6VX71; P32343; sce:YKL124W	8.87053e+07	9.58083e+07	1.00046e+08	9.48531e+07	7.66372e+07	9.12681e+07	6.60928e+07	7.79994e+07	0.822317	0.1033
P27810	KTR1	D6W2G0; P27810; sce:YOR099W	2.98567e+08	2.56312e+08	1.40355e+08	2.31745e+08	1.13402e+08	1.65216e+08	1.22109e+08	1.33576e+08	0.576391	0.120725
P47170	IML1	D6VWV7; P47170; sce:YJR138W	2.96477e+07	2.74475e+07	3.45419e+07	3.05457e+07	1.36587e+07	1.84997e+07	2.38117e+07	1.86567e+07	0.610779	0.0299781
Q07376	MCH1	D6VRU2; Q07376; sce:YDL054C	2.19997e+08	1.82386e+08	1.97451e+08	1.99945e+08	1.19833e+08	1.08058e+08	1.57434e+08	1.28442e+08	0.642387	0.0179735
P31381	FUN26	D6VPJ6; P31381; sce:YAL022C	1.31156e+08	1.04094e+08	1.1638e+08	1.1721e+08	9.08077e+07	9.5495e+07	8.62195e+07	9.08407e+07	0.775027	0.0332471
P42837	FIG4	D6W0M2; P42837; sce:YNL325C	9.78368e+07	2.05127e+08	1.00365e+08	1.34443e+08	2.29543e+08	3.31219e+08	2.36457e+08	2.6574e+08	1.9766	0.0528387
P32867	SSO1	D6W3D8; P32867; sce:YPL232W	1.31644e+08	5.91189e+07	2.59597e+07	7.22408e+07	1.9249e+07	4.42047e+06	3.05783e+07	1.80826e+07	0.25031	0.166966
Q05902	ECM38	D6VYU3; Q05902; sce:YLR299W	2.46411e+07	3.54379e+07	1.09037e+07	2.36609e+07	3.95472e+07	5.51412e+07	7.99089e+07	5.81991e+07	2.45971	0.0656606
P40152	PPN2	D6W0X3; P40152; sce:YNL217W	1.5426e+08	1.60001e+08	1.49583e+08	1.54615e+08	2.21782e+08	1.79955e+08	2.2458e+08	2.08772e+08	1.35028	0.0587483
P53879	RHO5	D6W106; P53879; sce:YNL180C	6.068e+07	5.10682e+07	2.5447e+07	4.57317e+07	1.42064e+07	2.25483e+07	1.58531e+07	1.75359e+07	0.383452	0.0596776
P21801	SDH2	D6VXW5; P21801; sce:YLL041C	5.89691e+07	6.39396e+07	1.82655e+07	4.70581e+07	2.47863e+07	2.40461e+07	1.66012e+07	2.18112e+07	0.463496	0.220368
P36051	MCD4	D6VX34; P36051; sce:YKL165C	2.01977e+08	2.52518e+08	2.57981e+08	2.37492e+08	1.36004e+08	1.25865e+08	1.89876e+08	1.50581e+08	0.634048	0.0311916
Q12010	YPQ1	D6W1X6; Q12010; sce:YOL092W	4.92059e+08	7.11347e+08	5.54214e+08	5.85873e+08	6.07098e+08	5.09402e+08	4.34055e+08	5.16852e+08	0.88219	0.448662
Q06451	TPO3	D6W4F2; Q06451; sce:YPR156C	1.82392e+08	2.19246e+08	3.97955e+07	1.47145e+08	1.4057e+08	9.23245e+07	1.90034e+08	1.40976e+08	0.958078	0.925004
P53191	PIB2	D6VUB4; E9P8Z2; P53191; sce:YGL023C	2.05469e+07	2.01207e+07	2.11411e+07	2.06029e+07	3.18303e+07	5.43393e+07	1.83577e+07	3.48424e+07	1.69114	0.246546
P42836	PFA3	D6W0M1; P42836; sce:YNL326C	8.15301e+07	9.22891e+07	6.5672e+07	7.98304e+07	5.22533e+07	4.17339e+07	6.78099e+07	5.39324e+07	0.675587	0.0749276
P40501	AVT7	D6VVJ9; P40501; sce:YIL088C	2.96322e+08	4.12414e+08	4.6555e+08	3.91429e+08	4.17592e+08	3.75233e+08	4.28731e+08	4.07185e+08	1.04025	0.779262
P50945	MIC27	D6W179; P50945; Q45U03; sce:YNL100W	3.56987e+08	2.82326e+08	1.03922e+08	2.47745e+08	1.27325e+07	1.84461e+07	1.65425e+07	1.5907e+07	0.0642072	0.0907253
Q03897	MTC5	D6VSB4; Q03897; sce:YDR128W	3.70077e+07	2.74443e+07	2.41949e+07	2.95489e+07	2.67012e+07	3.17158e+07	3.39546e+07	3.07905e+07	1.04202	0.791936
Q12116	TMS1	D6VS91; Q12116; sce:YDR105C	3.32673e+07	3.19109e+07	2.60595e+07	3.04126e+07	2.06924e+07	3.06845e+07	3.18799e+07	2.77523e+07	0.912526	0.559066
Q03730		D6VZF6; Q03730; Q6B2K7; sce:YML018C	1.63764e+08	1.02976e+08	1.05407e+08	1.24049e+08	8.89763e+07	1.20249e+08	6.82173e+07	9.24808e+07	0.745519	0.274788
P38146	YPT10	D6VQR1; P38146; sce:YBR264C	1.28343e+08	1.26508e+08	1.35078e+08	1.29976e+08	1.79241e+08	1.81911e+08	1.81471e+08	1.80874e+08	1.3916	4.89455e-05
Q12096	GNT1	D6W318; Q12096; sce:YOR320C	4.5867e+07	5.08499e+07	3.11563e+07	4.26244e+07	3.20726e+07	3.73597e+07	3.37832e+07	3.44052e+07	0.80717	0.249985
P32335	MSS51	D6VYK4; P32335; sce:YLR203C	1.58851e+07	1.76652e+07	7.90019e+06	1.38168e+07	6.23663e+06	6.84016e+06	5.84234e+06	6.30638e+06	0.456428	0.128209
P53283	TPO2	D6VUR9; P53283; sce:YGR138C	8.84138e+07	1.282e+08	3.13183e+07	8.26442e+07	3.0902e+07	1.71811e+07	4.12258e+07	2.97696e+07	0.360215	0.141979
P38142	VVS1	D6VQN7; P38142; Q6B2Y5; sce:YBR241C	1.22554e+08	1.43923e+08	8.97903e+07	1.18756e+08	4.68908e+08	4.69831e+08	4.71669e+08	4.70136e+08	3.95885	2.39749e-05
Q02887	ATG21	D6W3R6; Q02887; sce:YPL100W	1.5321e+07	8.59353e+06	2.95543e+07	1.7823e+07	1.08541e+07	1.13767e+07	1.1275e+07	1.11686e+07	0.62664	0.394146
P50079	HSV2	D6VV05; P50079; sce:YGR223C	3.74516e+07	1.97539e+07	7.26376e+07	4.3281e+07	3.39894e+07	2.4047e+07	3.5303e+07	3.11132e+07	0.718864	0.487868
Q12042		D6W3K6; Q12042; sce:YPL162C	8.24959e+07	7.9148e+07	8.75608e+07	8.30682e+07	6.94349e+07	2.59962e+07	6.30046e+07	5.28119e+07	0.635765	0.151022
P20795	VPS33	D6VZ31; P20795; sce:YLR396C	7.74533e+07	9.91518e+07	4.21982e+07	7.29344e+07	1.73839e+08	2.77117e+08	1.90506e+08	2.13821e+08	2.93168	0.0174346
Q04162		D6VT21; Q04162; sce:YDR387C	1.65891e+07	1.88884e+07	2.56036e+07	2.03604e+07	2.38861e+07	2.9612e+07	2.48022e+07	2.61001e+07	1.28191	0.150714
P34110	VPS35	D6VW33; P34110; sce:YJL154C	8.70157e+07	6.00972e+07	2.53172e+07	5.74767e+07	6.51002e+07	1.70814e+07	8.07782e+07	5.43199e+07	0.945078	0.909885
P41318	LST8	D6W1H1; P41318; sce:YNL006W	2.47057e+07	2.15583e+07	2.35517e+07	2.32719e+07	3.75366e+07	5.99473e+07	2.40554e+07	4.05131e+07	1.74086	0.176181
P40335	PEP8	D6VWC9; E9P910; P40335; sce:YJL053W	1.07599e+07	1.13456e+07	1.05509e+07	1.08855e+07	6.12605e+06	9.07779e+06	6.64014e+06	7.28133e+06	0.668904	0.0186139
P33894	STE13	D6W2S4; P33894; Q9URF1; sce:YOR219C	2.28655e+07	2.40727e+07	2.10738e+07	2.26706e+07	1.01311e+07	1.78889e+07	1.87742e+07	1.55981e+07	0.688031	0.0700303
P53950	VAC7	D6W1C5; P53950; sce:YNL054W	6.38708e+07	5.16378e+07	3.60554e+07	5.05213e+07	6.28066e+07	4.93954e+07	4.28781e+07	5.16934e+07	1.0232	0.911997
P32854	PEP12	D6W2A3; P32854; sce:YOR036W	4.23746e+07	2.45003e+07	2.85406e+07	3.18052e+07	1.66637e+07	7.41027e+06	6.0818e+06	1.00519e+07	0.316047	0.0266838
Q04934	IVY1	D6VSL1; Q04934; sce:YDR229W	9.67262e+06	1.1774e+07	2.4316e+07	1.52542e+07	1.11015e+08	7.4664e+07	5.00047e+07	7.85611e+07	5.15013	0.0258306
Q05919	VPS38	D6VYZ7; Q05919; Q6B1J7; sce:YLR360W	1.39118e+07	1.34632e+07	3.45906e+07	2.06552e+07	1.66411e+07	1.5061e+07	2.21718e+07	1.7958e+07	0.869417	0.730311
P39548	YAR028W	D6VPN0; P39548; sce:YAR028W	4.52812e+07	3.73827e+07	2.2128e+07	3.49307e+07	5.75607e+07	7.61264e+07	6.46154e+07	6.61008e+07	1.89234	0.0229936
P30605	ITR1	D6VTB9; P30605; sce:YDR497C	1.30809e+08	7.25791e+07	5.00715e+07	8.44867e+07	5.3828e+07	5.64332e+07	4.22805e+07	5.08473e+07	0.601838	0.240807
P53011	SEH1	D6VU45; P53011; sce:YGL100W	1.44104e+08	1.47241e+08	7.74918e+07	1.22946e+08	1.97383e+08	7.74322e+07	4.0977e+08	2.28195e+08	1.85606	0.351065
P40074	AVT6	D3DM25; P40074; sce:YER119C	1.36722e+08	1.16207e+08	1.03782e+08	1.18904e+08	1.63084e+08	2.19759e+08	1.37045e+08	1.73296e+08	1.45745	0.106863
P25515	VMA3	D3DLM1; P25515; sce:YEL027W	2.48888e+08	2.19455e+08	7.63319e+08	4.10554e+08	1.42481e+08	1.97882e+08	5.48738e+08	2.96367e+08	0.721871	0.627533
P53388	DIP5	D6W3A5; P53388; sce:YPL265W	8.10367e+07	7.15124e+07	3.38381e+07	6.21291e+07	9.34111e+07	5.98271e+07	7.93839e+07	7.75407e+07	1.24806	0.425616
P40570	VLD1	D6VVU4; P40570; sce:YIR014W	4.33491e+07	4.9973e+07	5.76303e+07	5.03175e+07	5.49434e+07	7.48236e+07	6.65794e+07	6.54488e+07	1.30072	0.0997683
P47159		D6VWU3; P47159; Q6Q5M7; sce:YJR124C	6.40736e+07	6.43316e+07	9.70435e+07	7.51496e+07	6.34408e+07	5.86542e+07	6.86106e+07	6.35685e+07	0.845893	0.402517
Q03212	EAR1	D6VZZ3; Q03212; Q03830; sce:YMR171C	2.41662e+07	2.4256e+07	2.19024e+07	2.34415e+07	6.8707e+06	1.85324e+07	7.68007e+06	1.10277e+07	0.470436	0.0752536
Q06810	OPY2	D6W479; Q06810; Q6B149; sce:YPR075C	3.31022e+07	1.5403e+07	2.08944e+07	2.31332e+07	4.48187e+06	1.06301e+07	5.41574e+06	6.84256e+06	0.29579	0.0430251
P50944	AVT4	D6W178; P50944; sce:YNL101W	5.55425e+07	4.58659e+07	3.44618e+07	4.52901e+07	4.91727e+07	4.53374e+07	2.78303e+07	4.07801e+07	0.900421	0.641146
P19073	CDC42	D6VYN1; P19073; Q05978; sce:YLR229C	7.89296e+08	7.52967e+08	3.2048e+08	6.20915e+08	8.3692e+08	9.58463e+08	9.45921e+08	9.13768e+08	1.47165	0.185356
P21560	CBP3	D6W3F5; P21560; sce:YPL215W	6.8388e+07	6.47357e+07	1.39192e+07	4.90143e+07	1.79869e+07	2.54046e+07	1.75275e+07	2.03064e+07	0.414295	0.242466
P17064	FCY2	D3DLV9; P17064; sce:YER056C	1.26118e+08	1.28961e+08	5.14554e+07	1.02178e+08	8.0182e+07	6.12631e+07	1.09679e+08	8.3708e+07	0.819237	0.559112
P38742	NPR3	D3DKU5; P38742; sce:YHL023C	7.04858e+06	5.28253e+06	1.0862e+07	7.73104e+06	3.61943e+06	5.26227e+06	6.13205e+06	5.00458e+06	0.647336	0.205172
P48558	BXI1	D6W0P0; P48558; Q6B2Q1; sce:YNL305C	1.27343e+08	1.19626e+08	9.88419e+07	1.1527e+08	6.40798e+07	5.87085e+07	1.0658e+08	7.6456e+07	0.663278	0.0891533
Q07549	SNA4	D6VRM7; Q07549; sce:YDL123W	3.84147e+08	1.8329e+08	9.63603e+07	2.21266e+08	1.55037e+08	1.61937e+08	1.50359e+08	1.55778e+08	0.704031	0.52262
P38270	ATG14	D6VQC5; P38270; sce:YBR128C	8.07328e+06	7.95859e+06	1.48971e+07	1.03096e+07	1.64445e+07	8.93162e+06	1.42007e+07	1.31923e+07	1.27961	0.418201
Q08921	TCO89	D6W3I8; Q08921; sce:YPL180W	1.0967e+07	7.97765e+06	1.5303e+07	1.14159e+07	1.42327e+07	4.93821e+07	1.14033e+07	2.5006e+07	2.19046	0.381803
Q08281	RTC1	D6W1T1; Q08281; Q92271; sce:YOL138C	1.52594e+07	2.20934e+07	2.4936e+07	2.07629e+07	2.18657e+07	2.28467e+07	2.11919e+07	2.19681e+07	1.05805	0.700138
Q08157		D6W247; Q08157; sce:YOL019W	3.04291e+07	2.40424e+07	8.84371e+06	2.11051e+07	2.77856e+07	1.7654e+07	2.62036e+07	2.38811e+07	1.13153	0.716993
Q12016	VPS68	D6W1T9; Q12016; sce:YOL129W	3.0704e+07	9.22777e+07	8.18856e+07	6.82891e+07	4.87592e+07	1.64487e+07	1.15286e+08	6.01645e+07	0.881026	0.8267
Q00582	GTR1	D6W0G3; Q00582; sce:YML121W	9.23271e+06	9.50139e+06	1.85928e+07	1.24423e+07	1.03042e+07	2.55934e+06	1.50494e+07	9.30435e+06	0.747799	0.546234
P36062	AVT3	D6VX50; P36062; sce:YKL146W	1.51365e+08	1.98084e+08	2.05314e+08	1.84921e+08	1.71902e+08	1.28308e+08	1.45414e+08	1.48542e+08	0.80327	0.160302
P25625	PER1	D6VR53; P25625; sce:YCR044C	8.61962e+06	2.98562e+06	6.19534e+06	5.93353e+06	1.30297e+06	1.48454e+06	2.41558e+06	1.73437e+06	0.292299	0.0654955
P46996		D6VW24; P46996; sce:YJL163C	1.18545e+07	1.43992e+07	1.38602e+07	1.33713e+07	1.56824e+07	1.43478e+07	1.52389e+07	1.50897e+07	1.12851	0.11883
Q08234	YOL075C	D6W1Z3; Q08233; Q08234; sce:YOL075C	1.00259e+07	9.76049e+06	3.34053e+06	7.70898e+06	2.50995e+06	1.50985e+06	5.29036e+06	3.10339e+06	0.402568	0.13459
P40046	VTC1	D3DLX7; P40046; sce:YER072W	1.19989e+09	7.88762e+08	6.79877e+08	8.8951e+08	7.5404e+08	8.71404e+08	5.3499e+08	7.20145e+08	0.809597	0.415227
P39923	NPR2	D3DLI8; P39923; Q6B264; sce:YEL062W	9.35005e+06	3.77043e+06	2.76062e+07	1.35755e+07	9.29347e+06	1.21433e+07	1.12337e+07	1.08902e+07	0.802189	0.745691
Q12424		D6VRE8; Q12424; sce:YDL206W	7.09657e+06	8.23899e+06	7.9513e+06	7.76229e+06	2.30098e+07	6.48187e+06	7.19554e+06	1.22291e+07	1.57545	0.494876
Q08299	ENB1	D6W1R2; Q08299; sce:YOL158C	2.95426e+07	2.17107e+07	5.91842e+06	1.90573e+07	9.08644e+07	3.87423e+07	1.00269e+08	7.66252e+07	4.02079	0.0474468
P38247	SLM4	D6VQ76; P38247; sce:YBR077C	9.15771e+06	9.47833e+06	8.20088e+06	8.94564e+06	1.50442e+07	2.7105e+07	2.06145e+07	2.09212e+07	2.33871	0.0268871
P48836	VMA10	D3DKY7; P48836; sce:YHR039C-A	2.00704e+07	4.49712e+07	1.02119e+07	2.50845e+07	1.91368e+07	6.84861e+07	5.21174e+07	4.65801e+07	1.85693	0.294199
P38090	AGP2	D6VQC9; P38090; sce:YBR132C	4.23315e+07	3.48004e+07	2.01147e+07	3.24155e+07	6.04044e+07	3.55914e+07	3.75642e+07	4.452e+07	1.37342	0.304834
P53059	MNT2	D6VV78; P53059; sce:YGL257C	6.86139e+06	8.13283e+06	7.29278e+06	7.429e+06	3.88259e+06	161700	2.93272e+06	2.32567e+06	0.313053	0.0122912
P53290	GTR2	D6VUU7; P53290; sce:YGR163W	5.21967e+06	7.20924e+06	1.35287e+07	8.65254e+06	6.07894e+06	3.49161e+06	5.85629e+06	5.14228e+06	0.594309	0.254103
P14359	SNA3	D6VW35; P14359; Q6B236; sce:YJL151C	8.21591e+06	2.40891e+06	357854	3.66089e+06	382414	1.78406e+06	4.05167e+06	2.07271e+06	0.566178	0.572138
P23643	VPS3	D6VTB7; P23643; sce:YDR495C	3.97532e+06	4.99866e+06	5.78171e+06	4.91857e+06	4.22728e+06	5.16414e+06	7.18155e+06	5.52433e+06	1.12316	0.583307
P32842	VMA11	D6W3D6; P32365; P32842; sce:YPL234C	2.62312e+08	2.16613e+08	4.42476e+08	3.07134e+08	1.95388e+08	1.77908e+08	2.50891e+08	2.08063e+08	0.677433	0.242853
Q02896	YDC1	D6W3T0; Q02896; sce:YPL087W	2.61008e+07	3.04908e+07	24620492	2.70707e+07	3.40493e+07	5.95795e+07	5.74813e+07	5.037e+07	1.86069	0.0983497
P53947	YNL058C	D6W1C1; P53947; sce:YNL058C	1.11317e+07	7.00221e+06	4.52654e+06	7.55349e+06	1.00961e+06	1.11069e+06	1.40728e+06	1.17586e+06	0.155671	0.0298208
Q12284	ERV2	D6W448; Q12284; sce:YPR037C	2.82711e+07	2.91742e+07	1.69073e+07	2.47842e+07	1.64985e+07	4.16797e+07	1.55398e+07	2.45727e+07	0.991463	0.983165
P13856	RSR1	D6VUT2; P13856; sce:YGR152C	2.79842e+07	2.20784e+07	1.85392e+07	2.28673e+07	1.47681e+07	1.48833e+07	1.94613e+07	1.63709e+07	0.715911	0.108875
P47008	SFH5	D6VW40; P47008; Q6Q535; sce:YJL145W	7.13794e+06	5.43788e+06	3.84663e+06	5.47415e+06	4.05879e+06	6.19352e+06	7.39935e+06	5.88389e+06	1.07485	0.778638
P39547	UIP3	D6VPM9; P39547; sce:YAR027W	3.99821e+07	3.04462e+07	1.23201e+07	2.75828e+07	1.06153e+07	1.47996e+07	1.22643e+07	1.25597e+07	0.455346	0.141012
P38301	GDT1	D6VQI2; E9PAD4; P38301; Q6Q545; sce:YBR187W	4.75271e+07	3.65997e+07	1.28162e+07	3.23143e+07	2.39029e+07	3.139e+07	1.98158e+07	2.50362e+07	0.774772	0.537048
Q04562	TMN2	D6VS93; Q04562; sce:YDR107C	4.62599e+06	4.33991e+06	1.83955e+06	3.60182e+06	1.88714e+06	2.10564e+06	2.93293e+06	2.30857e+06	0.640946	0.241128
P40857	PHS1	D6VW87; P40857; sce:YJL097W	4.05772e+07	3.69038e+07	2.1199e+07	3.28933e+07	2.08991e+07	2.45866e+07	2.65161e+07	2.40006e+07	0.72965	0.222749
P53918	ESBP6	D6W158; P53918; sce:YNL125C	4.07837e+06	3.45474e+06	276653	2.60326e+06	830245	657173	1.27298e+06	920132	0.353454	0.287865
P38182	ATG8	D6VPS5; P38182; sce:YBL078C	2.32834e+07	2.79357e+07	3.70224e+07	2.94138e+07	2.97291e+07	3.33381e+07	3.46845e+07	3.25839e+07	1.10778	0.501613
Q12057	PIN2	D6W2G4; Q12057; sce:YOR104W	3.02539e+06	1.29526e+06	646700	1.65578e+06	275682	285252	341413	300783	0.181656	0.196434
P11792	SCH9	D3DLF4; P11792; sce:YHR205W	1.88425e+06	1.37524e+06	3.03103e+06	2.09684e+06	423977	2.77809e+06	1.96791e+06	1.72332e+06	0.821867	0.681832
P53142	VPS73	D6VU42; P53142; sce:YGL104C	2.85354e+06	2.09301e+06	1.85442e+06	2.26699e+06		236845	229349	233097	0.102822	0.0136048
P25591	VAC17	D6VQV5; P25590; P25591; sce:YCL063W	2.15038e+06	864352	1.29118e+06	1.4353e+06	2.87308e+06	5.35251e+06	2.58543e+06	3.60367e+06	2.51074	0.0859698
P47040	YHC3	D6VWC3; O60004; P47040; Q6B1E1; sce:YJL059W	1.64393e+07	1.7328e+07	1.47924e+07	1.61865e+07	1.37466e+07	1.57966e+07	1.6488e+07	1.53437e+07	0.947931	0.489503
P53262	VOA1	D6VUN8; P53262; sce:YGR106C	6.80697e+07	7.11655e+07	8.26759e+07	7.39704e+07	7.67549e+07	1.83571e+07	8.24455e+07	5.91858e+07	0.800128	0.54808
Q04121	NHX1	D6VT80; Q04121; sce:YDR456W	4.0785e+06	2.73177e+06	1.22406e+06	2.67811e+06		2.11543e+06		2.11543e+06	0.789898	0.765435
Q06328	YPQ2	D6VSY2; Q06328; sce:YDR352W	1.9955e+06	3.03556e+06	890573	1.97388e+06	2.19384e+06		1.91738e+06	2.05561e+06	1.04141	0.92564
Q03446	RCR2	D6VRZ0; Q03446; sce:YDR003W	1.4792e+07	1.15216e+07	4.55155e+06	1.02884e+07	1.08487e+07	8.01168e+06	1.14998e+07	1.01201e+07	0.98364	0.960622
P40514		D6VVL7; P40514; Q6B2R2; sce:YIL067C	4.33555e+06	3.483e+06	1.21248e+06	3.01034e+06	2.06004e+06	1.86275e+06	2.33656e+06	2.08645e+06	0.693093	0.382272
P38778	SMF2	D3DKZ8; P38778; sce:YHR050W	5.53967e+06	6.06239e+06	1.946e+06	4.51602e+06	3.62067e+06	5.09286e+06	5.68162e+06	4.79838e+06	1.06252	0.853266
P38735	VMR1	D3DKT3; P38735; sce:YHL035C		1.05356e+06		1.05356e+06					**	**
Q04491	SEC13	D6VYK9; Q04491; sce:YLR208W	665069	2.15568e+06	82805.7	967850	4.23431e+06	2.33823e+06	7.33224e+06	4.63493e+06	4.78889	0.0811797
P53838	BOR1	D6W0R9; P53838; sce:YNL275W	7.68335e+06	9.44977e+06	3.44955e+06	6.86089e+06	6.6179e+06	2.70136e+06	7.79602e+06	5.70509e+06	0.831539	0.649131
P33300	SUR1	D6W3V7; P33300; sce:YPL057C	9.7952e+06	9.46808e+06	2590609	7.28463e+06	6.94367e+06	3.72889e+06	3.64175e+06	4.77144e+06	0.655	0.386488
P38731	ARN1	D3DKS9; P38731; sce:YHL040C	392510	458185	217563	356086	8.72252e+06	3.19448e+06	1.01675e+07	7.36151e+06	20.6734	0.0808159
Q3E7B6	VMA9	D6VR05; Q3E7B6; sce:YCL005W-A	1.31084e+09	9.54385e+08	1.34358e+09	1.20294e+09	1.11416e+09	8.53888e+08	5.54504e+08	8.40849e+08	0.698996	0.150798
P38287	CSH1	D6VQF6; P38287; sce:YBR161W	1.85612e+06	2.18291e+06	1.10429e+06	1.71444e+06	1.59815e+06	331641	1.80469e+06	1.24483e+06	0.726084	0.449156
P25621	FEN2	D6VR38; P25621; sce:YCR028C	4.16368e+06	3.47566e+06	551243	2.7302e+06	4.36853e+06	3.55993e+06	3.54394e+06	3.82413e+06	1.40068	0.391753
P39111	VMA7	D6VUF5; P39111; sce:YGR020C	246978	835383		541180	1.39428e+06	131343	660712	728777	1.34664	0.742697
P38279	RTC2	D6VQE2; P38279; sce:YBR147W			104133	104133	1.57226e+06	2.08313e+06	363002	1.33946e+06	12.863	0.349555
P40343	VPS27	D6W1I1; P40343; sce:YNR006W	473407	833100	157920	488143	1.12644e+06	595313	232960	651569	1.33479	0.641086
P38724	ARN2	D3DKS4; P38724; sce:YHL047C					6.7912e+06	3.39572e+06	3.6369e+06	4.60794e+06	*	*
Q06651	PIB1	D6VSU2; Q06651; Q6Q5S5; sce:YDR313C	3.10766e+06		1.77594e+06	2.4418e+06	392124	1.73296e+06	171826	765638	0.313555	0.127727
P38753	HSE1	D3DKR2; P38753; sce:YHL002W		389237		389237					**	**
Q04272	VPS20	D6VZQ1; Q04272; sce:YMR077C	2.73035e+06	2.3711e+06	1.42519e+06	2.17554e+06	2.80375e+06	3.84874e+06	1.80491e+06	2.81913e+06	1.29583	0.41408
P53882	TDA7	D6W109; P53882; sce:YNL176C	9.49308e+06	1.76239e+06	1.3303e+06	4.19526e+06	5.91952e+06	1.86242e+06	1.27347e+06	3.01847e+06	0.719497	0.717295
P38356	BSD2	D6VQT5; P38356; sce:YBR290W	1.09419e+06	1.34929e+06	221749	888410	428201	705265	761040	631502	0.710823	0.511048
P38273	CCZ1	D6VQC8; P38273; sce:YBR131W	1.91898e+07		1.31493e+07	1.61695e+07		345860		345860	0.0213896	0.203264
P47041	BIT61	D6VWC4; P47041; sce:YJL058C	480286	518776	1.0295e+06	676189		753284	438723	596004	0.881416	0.775323
P43601	ATG18	D6VTQ1; P43601; sce:YFR021W	349498	373187	111155	277947	192994	522844	575623	430487	1.54881	0.355283
P39980	SIT1	D3DLI5; E9P951; P39980; sce:YEL065W	1.20106e+06	1.41445e+06	244049	953186	2.10864e+06	5.25566e+06	7.43612e+06	4.93347e+06	5.17577	0.0662672
