# Supplementary material for: Iron Limitation Restores Autophagy and Increases Lifespan in the Yeast Model of Niemann–Pick Type C1
Source: Int J Mol Sci. 2023 Mar 25;24(7):6221. doi: 10.3390/ijms24076221 (PMC10094029; doi:10.3390/ijms24076221)
Supplement: Supplementary file 1 [file ijms-24-06221-s001.zip › Table S2.xlsx]

## Sheet: Table S2 - % phosphorylation
Phosphorylation residues identified in wild type and ncr1∆ samples and respective percentage of phosphorylation
* - phosphorylation only detected in ncr1∆ samples; ** - phosphorylation only detected in wild type samples
Annotated Sequence	Master Protein Accessions	Gene Symbol	Modifications in Master Proteins	Phosphorylated peptide amount - wild type			Total peptide amount - wild type			% Phosphorylation - wild type				Phosphorylated peptide amount - ncr1∆			Total peptide amount - ncr1∆			% Phosphorylation ncr1∆				Ratio ncr1∆/wt	p-value (Student's t-test)
				Sample 1	Sample 2	Sample 3	Sample 1	Sample 2	Sample 3	Sample 1	Sample 2	Sample 3	Mean	Sample 1	Sample 2	Sample 3	Sample 1	Sample 2	Sample 3	Sample 1	Sample 2	Sample 3	Mean
[-].MDATTPLLTVANSHPAR.[N]	Q99385	VCX1	Q99385 1xAcetyl [N-Term]; 1xPhospho [S13(100)]	1.02535e+07	1.73129e+07	1.34131e+07	2.66471e+08	3.16937e+08	2.61566e+08	3.84789	5.46256	5.12801	4.81282	3.53152e+06	0	6.66852e+06	1.96194e+08	1.19351e+08	2.67751e+08	1.80002	0	2.49057	1.43019	0.297164	0.0190742
[-].MEADDHVSLFRFPFK.[I]	Q12016	VPS68	Q12016 1xAcetyl [N-Term]; 1xPhospho [S8(100)]	7.80011e+06	5.51823e+06	3232679	2.97395e+07	8.94771e+07	78597623	26.2281	6.1672	4.11295	12.1694	500064	253030	5.45009e+06	4.33742e+07	1.12516e+07	1.12239e+08	1.15291	2.24885	4.8558	2.75252	0.226183	0.312808
[-].MEATSSALSSTANLVK.[T]	P40501	AVT7	P40501 1xPhospho [T4(99.1)]	573414	608374	823757	9.54088e+07	1.61262e+08	1.24309e+08	0.601007	0.377259	0.662666	0.546977	3.84504e+06	3.29754e+06	1.07063e+06	1.31953e+08	8.04259e+07	1.48134e+08	2.91395	4.1001	0.722748	2.57893	4.71488	0.110532
[-].MEGVYFNIDNGFIEGVVR.[G]	P32366	VMA6	P32366 1xPhospho [Y5(100)]	0	559369	1.07638e+06	8.35172e+06	4.7857e+07	1.76221e+07	0	1.16883	6.10812	2.42565	576528	0	0	8.89926e+06	1.03191e+06	2.03758e+07	6.47838	0	0	2.15946	0.890259	0.930161
[K].AADQADESSPLLSPSNSNHPSEHPQQDLNNK.[S]	Q12296	MAM3	Q12296 1xPhospho [S439(100)]	6.64995e+06	2.37117e+06	1.60994e+06	1.39951e+08	7.11224e+07	3.14467e+07	4.75163	3.33392	5.11958	4.40171	4.27149e+06	7.81257e+06	4.32817e+06	5.1896e+07	5.90109e+07	4.89452e+07	8.23087	13.2392	8.84287	10.1043	2.29554	0.0268903
[K].AVDIDTIDAQPLHEGPKIDDSPQDEVNSIK.[G]	Q04602	VBA4	Q04602 1xPhospho [S106(100)]	6.22612e+06	0	1.44867e+06	6.73629e+07	3.3305e+07	4.77775e+07	9.24265	0	3.03212	4.09159	0	199191	0	4.27602e+06	1.07217e+07	9.89068e+06	0	1.85782	0	0.619273	0.151353	0.281404
[K].CSPSFEQYDNDDTEDDAGEDK.[D]	Q12324	YVC1	Q12324 1xPhospho [T636(100)]	5.07795e+06	1.62067e+06	842803	4.89011e+07	2.02997e+07	1.19131e+07	10.3841	7.98372	7.07462	8.48082	1.31263e+06	1.20651e+06	900012	9.20942e+06	1.47048e+07	8.53624e+06	14.2531	8.20487	10.5434	11.0005	1.2971	0.280084
[K].DEANGEANGEFDTASK.[E]	Q03516	RSN1	Q03516 1xPhospho [S933(100)]	723960	967737	0	723960	967737	0	100	100	0	66.6667	0	0	259212	0	0	259212	0	0	100	33.3333	0.5	0.518519
[K].DRLEEEFDLTGPINNSQGSVDSGRR.[V]	P38966	YDR089W	P38966 1xPhospho [S612(100)]	6.61035e+06	2.56176e+06	992795	6.20735e+07	1.56948e+07	1.3831e+07	10.6492	16.3224	7.17807	11.3832	0	0	434764	3.52967e+06	3.30178e+06	3.94414e+06	0	0	11.023	3.67434	0.322786	0.164519
[K].DSSDEASVSPIADNER.[E]	P39968	VAC8	P39968 1xPhospho [S16(100)]	4.26837e+07	4.06024e+07	2.61897e+07	6.30073e+07	6.18334e+07	4.64608e+07	67.744	65.6642	56.3695	63.2592	2.16312e+07	3.34459e+07	2.76592e+07	4.78432e+07	6.79705e+07	4.83731e+07	45.2126	49.2064	57.1788	50.5326	0.798818	0.0622722
[K].DSSVPLIIDSSGSAN.[-]	P38310	FTH1	P38310 1xPhospho [S453(98.9)]	205474	169862	150973	2.10784e+07	3.58811e+07	4.76955e+07	0.974807	0.473402	0.316535	0.588248	1.6652e+06	2.68707e+06	1.45663e+06	4.84409e+07	4.88496e+07	7.29398e+07	3.4376	5.50071	1.99703	3.64511	6.19656	0.0416352
[K].EEVLTPTTSASTPHR.[I]	P42839	VNX1	P42839 1xPhospho [T26(100)]	652945	782856	107477	6.90817e+07	5.60911e+07	3.71719e+07	0.945178	1.39569	0.289135	0.876666	0	423929	946233	5.12847e+07	8.45015e+07	4.80256e+07	0	0.501682	1.97027	0.823983	0.939905	0.936979
[K].EPQHQAAVPVSQEENERITSQGDLEADGSSDEETEQEPHSK.[R]	P43585	VTC2	P43585 2xPhospho [S615(100); S616(100)]	1.44753e+06	0	0	5.44024e+07	1.47083e+07	7.93363e+06	2.66078	0	0	0.886927	0	0	0	2.68809e+06	3.3765e+06	4.51922e+06	0	0	0	0	**	0.42265
[K].FSSIVSNDIDMNFR.[S]	P43585	VTC2	P43585 1xPhospho [S196(100)]	2.51261e+06	452955	2157759	7.86144e+06	1.56626e+06	7.23614e+06	31.9612	28.9195	29.8192	30.2333	0	290363	697046	0	1.45046e+06	1.55301e+06	0	20.0187	44.8836	21.6341	0.715572	0.544787
[K].FYDNSNLINR.[E]	P47818	CCC1	P47818 1xPhospho [Y173(100)]	0	0	0	7.81361e+07	2.89128e+08	1.66035e+08	0	0	0	0	679726	1.84233e+06	266383	2.32264e+08	3.78742e+08	1.30583e+08	0.292653	0.486434	0.203995	0.327694	*	0.0624478
[K].GDNTDSTSYMDEDMIDANGENIAAAIGASVNYVTGVIAR.[D]	P32563	VPH1	P32563 1xPhospho [S160(98.9)]	2.13368e+06	1.36544e+06	1.027e+06	7.1636e+07	5.87276e+07	6.22111e+07	2.9785	2.32504	1.65083	2.31813	35832	0	0	2.45121e+07	6.56171e+06	5.58781e+07	0.146181	0	0	0.048727	0.02102	0.00422638
[K].GSGGTSELGGSESTPLLR.[G]	P47818	CCC1	P47818 1xPhospho [T32(99.4)]	9.01961e+06	7.64239e+06	6.16443e+06	3.89173e+08	2.93917e+08	2.12493e+08	2.31764	2.60018	2.901	2.60627	8.39132e+06	1.31573e+07	9.48225e+06	1.85994e+08	2.83866e+08	1.83525e+08	4.51159	4.63503	5.16675	4.77112	1.83063	0.0011715
[K].GSNSMEEGLSTR.[E]	P38244	PFF1	P38244 1xPhospho [S608(100)]	6.64198e+06	7.68385e+06	1.77976e+06	8.75614e+07	1.10487e+08	6.59473e+07	7.58551	6.95452	2.69876	5.74626	0	2.31218e+06	3.44192e+06	3.04294e+08	4.95384e+08	2.34079e+08	0	0.466745	1.47041	0.645719	0.112372	0.0329505
[K].HDDEEALLEESDSPESTAFY.[-]	P38929	PMC1	P38929 1xPhospho [S1164(99.3)]	298074	646813	0	4.5854e+06	4.21004e+06	3.34186e+06	6.50051	15.3636	0	7.28803	510933	325407	473981	5.38623e+06	5.7011e+06	4.25546e+06	9.48592	5.70778	11.1382	8.7773	1.20434	0.768133
[K].IAVEGLDENGRLIEGDTGSGIIPDEQER.[Q]	Q04991	FMP42	Q04991 1xPhospho [S238(100)]	2.90565e+07	2.01692e+07	2.31245e+07	1.42338e+08	1.70648e+08	1.63868e+08	20.4137	11.8192	14.1117	15.4482	7.35625e+06	5.7939e+06	9.82421e+06	1.7297e+08	1.80901e+08	6.89043e+07	4.2529	3.2028	14.2578	7.23782	0.468522	0.13289
[K].IDDSPQDEVNSIK.[G]	Q04602	VBA4	Q04602 1xPhospho [S106(100)]	2.02049e+07	9.5571e+06	6.69293e+06	2.6118e+07	1.27805e+07	1.06021e+07	77.3599	74.7786	63.1282	71.7556	0	3.8674e+06	0	178478	6.39519e+06	1.64451e+06	0	60.4736	0	20.1579	0.280924	0.118767
[K].IFPEEYTLETPTGLVPVATLHSIGR.[T]	Q06451	TPO3	Q06451 1xPhospho [S101(100)]	0	0	423665	1.92676e+07	3.47504e+07	9.16524e+06	0	0	4.62252	1.54084	0	4.90525e+06	1.79953e+07	1.57246e+07	1.33158e+07	3.80569e+07	0	36.8378	47.2853	28.041	18.1985	0.204703
[K].IITTHTPHSSK.[E]	Q12296	MAM3	Q12296 1xPhospho [T519(99.7)]	0	0	0	1.76989e+07	1.65252e+07	798450	0	0	0	0	0	3.4968e+06	437462	1.03151e+07	3.02921e+07	1.58387e+07	0	11.5436	2.76199	4.76852	*	0.30419
[K].IITTHTPHSSKEPSPAPHSNDK.[S]	Q12296	MAM3	Q12296 2xPhospho [T519(98.4); S527(100)]	2.2755e+06	2.14957e+06	204219	1.76989e+07	1.65252e+07	798450	12.8568	13.0078	25.577	17.1472	0	2.70892e+06	1.79834e+06	1.03151e+07	3.02921e+07	1.58387e+07	0	8.94265	11.3541	6.76558	0.394559	0.129299
[K].IITTHTPHSSKEPSPAPHSNDK.[S]	Q12296	MAM3	Q12296 3xPhospho [S523(98.7); S527(100); T/S]	1.8619e+06	5.51518e+06	559207	1.76989e+07	1.65252e+07	798450	10.5199	33.3743	70.0366	37.9769	1.55247e+06	4.28018e+06	3.91089e+06	1.03151e+07	3.02921e+07	1.58387e+07	15.0504	14.1297	24.692	17.9574	0.472849	0.320321
[K].LDAEEEQSSSYR.[S]	P40528	SYG1	P40528 1xPhospho [S44(99)]	0	0	0	3.07825e+07	2.52627e+07	2.04969e+06	0	0	0	0	0	772048	0	6.06681e+07	1.41341e+08	4.1189e+07	0	0.546229	0	0.182076	*	0.42265
[K].LGNNSVESLRECNYTLAVSGDVFR.[L]	Q12697	YPK9	Q12697 1xPhospho [S1120(98.7)]	2.78741e+06	0	0	2.58853e+07	4.30252e+07	4.4757e+07	10.7683	0	0	3.58944	0	0	1.23108e+06	4.41572e+07	6.18004e+07	4.25004e+07	0	0	2.89664	0.965546	0.268996	0.545379
[K].LGNNSVESLRECNYTLAVSGDVFR.[L]	Q12697	YPK9	Q12697 2xPhospho [S1117(100); S1120(98.6)]	684090	618193	202505	2.58853e+07	4.30252e+07	4.4757e+07	2.64278	1.43682	0.452454	1.51068	0	0	0	4.41572e+07	6.18004e+07	4.25004e+07	0	0	0	0	**	0.0755905
[K].LMGVDSEEEEIELPPGVK.[K]	P43585	VTC2	P43585 1xPhospho [S657(100)]	8.0115e+07	4.95711e+07	2.62857e+07	1.29748e+08	8.87658e+07	5.4859e+07	61.7466	55.8448	47.915	55.1688	2.96317e+07	2.67243e+07	3.1546e+07	4.63708e+07	4.45619e+07	4.60912e+07	63.9018	59.9713	68.4426	64.1052	1.16198	0.12986
[K].LNDLDFGNSDAISLR.[R]	P39109	YCF1	P39109 1xPhospho [S903(100)]	8.3358e+07	1.98938e+08	1.37932e+08	9.99068e+07	2.22234e+08	1.6252e+08	83.4358	89.5175	84.871	85.9414	1.0005e+08	1.58167e+08	8.08528e+07	1.24298e+08	1.77526e+08	1.12036e+08	80.4918	89.0949	72.1667	80.5844	0.937667	0.362379
[K].LSHFSNLEDASFK.[S]	Q02725	VTC3	Q02725 1xPhospho [S198(100)]	1.21013e+07	4.94821e+06	2.78e+06	1.18932e+08	1.03022e+08	9.37351e+07	10.1749	4.80306	2.96581	5.98126	1.56956e+06	1.79138e+06	1.16032e+06	8.97902e+07	6.09572e+07	6.84044e+07	1.74803	2.93874	1.69626	2.12768	0.355724	0.154765
[K].NPIDELLYSSTDEDEQSPLINNNTITTNYVDNNCTK.[D]	P32386	YBT1	P32386 1xPhospho [S81(98.8)]	3.44216e+06	1.89618e+06	0	8.61039e+07	5.24942e+07	3.71744e+07	3.99768	3.61216	0	2.53661	0	0	0	2.34399e+07	3.39602e+07	4.12264e+07	0	0	0	0	**	0.184574
[K].NVTNSGNLDSTSSSTGSITEDEK.[R]	Q12256	TPO4	Q12256 1xPhospho [S44(99.5)]	741195	450041	0	4.45713e+06	2.43716e+06	106683	16.6294	18.4658	0	11.6984	0	0	0	0	0	424208	0	0	0	0	**	0.184623
[K].QESATLDHESISR.[R]	P35724	MNR2	P35724 1xPhospho [S576(100)]	6.97849e+06	4.19102e+06	1.05343e+06	2.81751e+07	2.70149e+07	1.69936e+07	24.7683	15.5138	6.19898	15.4937	692719	1.47351e+06	1.89998e+06	2.98425e+07	3.45765e+07	2.64103e+07	2.32125	4.26161	7.19409	4.59231	0.296399	0.120647
[K].RDSSIIMANEPVAIK.[F]	P39962	YCK3	P39962 1xPhospho [S48(100)]	953513	430163	278701	2.28077e+06	1.47991e+06	2.26675e+06	41.8066	29.0669	12.2952	27.7229	0	0	0	360119	685003	136229	0	0	0	0	**	0.0315336
[K].RLDDQTDVEQSPLLER.[S]	Q07376	MCH1	Q07376 1xPhospho [S255(100)]	5.34929e+06	4.87234e+06	1.66122e+06	1.13297e+08	6.57201e+07	4.75712e+07	4.72149	7.41377	3.49207	5.20911	0	1.9462e+06	541484	4.48717e+07	4.14209e+07	5.24132e+07	0	4.6986	1.03311	1.91057	0.366774	0.147144
[K].RSPTAYGATTASSNCIVDDAVNCNTSNCL.[-]	P20107	ZRC1	P20107 1xPhospho [S425(99.4)]	3.16749e+06	991910	1.2607e+06	1.041e+08	2.39975e+07	3.46652e+07	3.04274	4.13339	3.63678	3.6043	0	247268	831251	6.4905e+06	1.77503e+07	2.21088e+07	0	1.39303	3.75982	1.71762	0.476547	0.173863
[K].RVNLISEEQLQQGATRETSNEASSTNSENVNK.[F]	P32386	YBT1	P32386 2xPhospho [S1519(100); S/T]	3.06546e+06	0	0	3.96963e+08	2.68559e+08	3.84416e+08	0.772229	0	0	0.25741	254826	2.95356e+06	0	1.95665e+08	2.32527e+08	2.59252e+08	0.130236	1.2702	0	0.466812	1.8135	0.683202
[K].RVNLISEEQLQQGATRETSNEASSTNSENVNK.[F]	P32386	YBT1	P32386 1xPhospho [S1516(99.6)]	0	594495	373120	3.96963e+08	2.68559e+08	3.84416e+08	0	0.221364	0.0970614	0.106142	0	0	667278	1.95665e+08	2.32527e+08	2.59252e+08	0	0	0.257386	0.0857954	0.808309	0.861458
[K].SFNDLQHTLSLSK.[Q]	P38966	YDR089W	P38966 1xPhospho [S327(100)]	7.75905e+06	3.8233e+06	1.81305e+06	5.79302e+07	3.53762e+07	4.0666e+07	13.3938	10.8075	4.45839	9.55324	1.14929e+06	0	0	1.2365e+07	1.47883e+07	9.34953e+06	9.29468	0	0	3.09823	0.324312	0.188519
[K].SFVTIK.[K]	Q12296	MAM3	Q12296 1xPhospho [S501(100)]	1.66299e+06	1.39605e+06	1.18563e+06	1.66299e+06	1.39605e+06	1.18563e+06	100	100	100	100	866284	1.67748e+06	1.62198e+06	866284	1.67748e+06	1.62198e+06	100	100	100	100	1	-
[K].SHSVPDLNTATPSSPK.[R]	P42839	VNX1	P42839 1xPhospho [S110(100)]	3.64753e+07	2.80332e+07	1.43607e+07	8.00605e+07	6.17011e+07	3.16833e+07	45.5597	45.4339	45.3259	45.4398	2.05664e+07	2.09581e+07	1.40063e+07	4.31073e+07	3.78386e+07	3.25842e+07	47.7097	55.3881	42.9851	48.6943	1.07162	0.418476
[K].SHSVPDLNTATPSSPKR.[M]	P42839	VNX1	P42839 1xPhospho [S121(99.6)]	3.53927e+06	2.16221e+06	749516	8.00605e+07	6.17011e+07	3.16833e+07	4.42075	3.50434	2.36565	3.43025	1.37271e+06	1.90254e+06	1.67247e+06	4.31073e+07	3.78386e+07	3.25842e+07	3.1844	5.02804	5.13276	4.4484	1.29682	0.306486
[K].SINGDEESTSSANLGAIINLMAIDAFK.[V]	P32386	YBT1	P32386 1xPhospho [S462(100)]	1.20278e+07	1.14152e+07	3.78031e+06	1.20278e+07	1.23694e+07	5.73004e+06	100	92.2854	65.9736	86.0863	7.19353e+06	6.70461e+06	1.31004e+07	8.54391e+06	7.95309e+06	1.37927e+07	84.1949	84.302	94.9809	87.8259	1.02021	0.881191
[K].SLLLGSFLDGIDEDK.[Q]	Q06708	VAC14	Q06708 1xPhospho [S819(100)]	134928	357393	0	134928	3.90214e+06	4237977	100	9.15891	0	36.3863	533318	177540	893308	533318	5.87143e+06	1.33509e+07	100	3.0238	6.69101	36.5716	1.00509	0.996945
[K].SNEFGDSSESSVRESSIPVEGELEQLQK.[L]	P39109	YCF1	P39109 3xPhospho [S872(96.2); S873(96.2); S]	0	2.52945e+06	0	3.38497e+08	3.83611e+08	2.36284e+08	0	0.659379	0	0.219793	0	1.49052e+06	1.41308e+06	3.31646e+08	4.67133e+08	2.45411e+08	0	0.319078	0.5758	0.298293	1.35715	0.786814
[K].SNEFGDSSESSVRESSIPVEGELEQLQK.[L]	P39109	YCF1	P39109 1xPhospho [S877(98.6)]	1.76561e+07	5.04983e+06	4.34267e+06	3.38497e+08	3.83611e+08	2.36284e+08	5.21604	1.31639	1.8379	2.79011	578916	2.79062e+06	4.24301e+06	3.31646e+08	4.67133e+08	2.45411e+08	0.174559	0.597392	1.72894	0.83363	0.29878	0.208404
[K].SNEFGDSSESSVRESSIPVEGELEQLQK.[L]	P39109	YCF1	P39109 3xPhospho [S873(99.3); S]	1.70797e+06	1.32461e+06	0	3.38497e+08	3.83611e+08	2.36284e+08	0.504574	0.345301	0	0.283292	0	848056	0	3.31646e+08	4.67133e+08	2.45411e+08	0	0.181545	0	0.0605149	0.213613	0.234835
[K].SNEFGDSSESSVRESSIPVEGELEQLQK.[L]	P39109	YCF1	P39109 2xPhospho [S877(99); S878(99)]	8.65984e+06	6.17313e+06	1.33268e+06	3.38497e+08	3.83611e+08	2.36284e+08	2.55832	1.60922	0.564017	1.57719	1.32865e+06	3.38843e+06	2.11885e+06	3.31646e+08	4.67133e+08	2.45411e+08	0.400623	0.725368	0.863387	0.663126	0.420449	0.19872
[K].SNSLSSDGNSNQDVEIGK.[S]	Q02725	VTC3	Q02725 1xPhospho [S274(100)]	1.30312e+07	4.84604e+06	1.43621e+06	2.65285e+08	9.06006e+07	3.04938e+07	4.91216	5.34879	4.70985	4.99027	1.69273e+06	2.33526e+06	1.80588e+06	6.47915e+07	1.3546e+08	7.22986e+07	2.61258	1.72396	2.49781	2.27812	0.456512	0.00130594
[K].SNSLSSDGNSNQDVEIGK.[S]	Q02725	VTC3	Q02725 2xPhospho [S267(99.1); S]	1.73497e+06	981841	0	2.65285e+08	9.06006e+07	3.04938e+07	0.654002	1.0837	0	0.579235	0	0	0	6.47915e+07	1.3546e+08	7.22986e+07	0	0	0	0	**	0.140085
[K].SSILSRANSSANLAAK.[S]	P32386	YBT1	P32386 2xPhospho [S940(100); S944(100)]	6.84245e+07	3.16574e+07	8.75933e+06	8.62696e+07	4.86154e+07	8.75933e+06	79.3148	65.1181	100	81.4776	1.83446e+07	2.41337e+07	2.99375e+07	2.05919e+07	2.78144e+07	3.36892e+07	89.0864	86.7668	88.864	88.2391	1.08299	0.541809
[K].SSILSRANSSANLAAK.[S]	P32386	YBT1	P32386 3xPhospho [S936(99.5); S940(100); S944(100)]	1.78451e+07	1.6958e+07	0	8.62696e+07	4.86154e+07	8.75933e+06	20.6852	34.8819	0	18.5224	2.24731e+06	3.68073e+06	3.75163e+06	2.05919e+07	2.78144e+07	3.36892e+07	10.9136	13.2332	11.136	11.7609	0.634957	0.541809
[K].SSTSLSNLPAVK.[E]	P32386	YBT1	P32386 2xPhospho [S955(100); S/T]	1.18817e+08	8.52329e+07	1.29947e+07	2.14604e+08	1.38348e+08	5.43076e+07	55.3655	61.6076	23.9279	46.967	2.73786e+07	7.09211e+07	3.57632e+07	5.95429e+07	1.31704e+08	6.56668e+07	45.9814	53.8489	54.4616	51.4306	1.09504	0.728467
[K].SVIFPQSYDPTITTLYFDNDFFDLYNNR.[L]	Q02725	VTC3	Q02725 1xPhospho [S285(100)]	1.27363e+06	35205.3	232465	2.53974e+07	2.2451e+07	1.53708e+07	5.01481	0.15681	1.51238	2.228	0	0	0	9.43125e+06	745275	1.41038e+07	0	0	0	0	**	0.263293
[K].SVLETYVEDK.[L]	Q04991	FMP42	Q04991 1xPhospho [S269(100)]	2.04853e+06	3.53654e+06	122221	3.40035e+08	2.89039e+08	2.80293e+08	0.602446	1.22355	0.0436048	0.623201	1.4158e+06	207723	2.15524e+06	2.783e+08	3.60229e+08	2.58091e+08	0.508733	0.0576641	0.835067	0.467155	0.749606	0.732348
[K].TGCISEEDTSDDEFDIEAPR.[A]	Q04121	NHX1	Q04121 1xPhospho [S499(99.5)]	1.00932e+06	760211	272186	1.00932e+06	760211	272186	100	100	100	100	0	342456	0	0	342456	0	0	100	0	33.3333	0.333333	0.183503
[K].THPNSPTPGIK.[A]	P35724	MNR2	P35724 1xPhospho [S461(100)]	900432	972423	0	1.26851e+07	1.32974e+07	95147.5	7.09832	7.31289	0	4.80374	2.55656e+06	1.03765e+07	0	6.42932e+06	2.29832e+07	2.99041e+06	39.7641	45.1484	0	28.3042	5.89211	0.238476
[K].TPSYSTSSHTIASGGNYTEHNK.[R]	P32798	COT1	P32798 1xPhospho [S225(100)]	9.22507e+06	3.78383e+06	1.71875e+06	6.28353e+07	2.1392e+07	1.65832e+07	14.6813	17.688	10.3644	14.2446	940528	1.57782e+06	2.02958e+06	3.08981e+07	3.73927e+07	4.478e+07	3.04397	4.2196	4.53233	3.93197	0.276032	0.00902709
[K].VATMQVWDTAGQER.[F]	P32939	YPT7	P32939 1xPhospho [T59(100)]	334352	491423	478072	2.49589e+08	2.65398e+08	2.58167e+08	0.133961	0.185165	0.185179	0.168102	0	930302	460307	3.1082e+08	3.49024e+08	2.80971e+08	0	0.266544	0.163827	0.143457	0.853394	0.758216
[K].VTESETEDEVVTESELELIK.[A]	P14772	BPT1	P14772 2xPhospho [T906(99.5); T916(100)]	3.51171e+06	2.98044e+06	1.61131e+06	1.94597e+07	1.04997e+07	8.80622e+06	18.046	28.3861	18.2975	21.5765	0	6.20673e+06	2.84007e+06	939371	1.36583e+07	5.53766e+06	0	45.4428	51.2864	32.2431	1.49436	0.58097
[R].AGDSQGDHLQNDPLSLRPK.[T]	P32798	COT1	P32798 1xPhospho [S407(100)]	3.49015e+06	1.07967e+06	761033	1.92358e+08	9.63487e+07	4.53487e+07	1.8144	1.12059	1.67818	1.53772	0	587492	426065	1.55969e+08	1.21015e+08	1.72369e+08	0	0.48547	0.247182	0.244217	0.158817	0.00714676
[R].APADVNAIADETTPLNSK.[H]	Q12078	SMF3	Q12078 1xPhospho [T425(99.5)]	1.10573e+06	645996	412087	5.43689e+08	5.23125e+08	4.90204e+08	0.203375	0.123488	0.0840644	0.136976	0	1.44465e+06	893231	1.45736e+09	1.31973e+09	8.53829e+08	0	0.109466	0.104615	0.0713601	0.520969	0.272186
[R].ASDATLGSIDFGDDENIAK.[R]	P39109	YCF1	P39109 1xPhospho [S914(99.1)]	946684	660475	0	8.8371e+06	1.07318e+07	9368121	10.7126	6.15439	0	5.62233	0	490294	376416	1.51227e+07	1.31544e+07	1.27067e+07	0	3.72724	2.96235	2.22986	0.396608	0.362972
[R].ASVSAMSPPLCR.[S]	P53273	YGR125W	P53273 1xPhospho [S42(100)]	0	0	116324	2.08905e+07	1.42131e+07	6.1178e+06	0	0	1.9014	0.6338	0	0	0	2.90195e+06	4.31288e+06	2.57441e+06	0	0	0	0	**	0.42265
[R].DGLLEDPDNVSFREALSEGK.[D]	P32386	YBT1	P32343 1xPhospho [S358(100)]	6.10054e+06	3.93801e+06	2.84092e+06	1.06783e+07	9.49496e+06	8.30386e+06	57.13	41.4747	34.212	44.2723	1.14123e+06	1.63322e+06	1.25239e+06	4.41378e+06	6.43704e+06	3.49275e+06	25.856	25.3723	35.8567	29.0283	0.655678	0.114642
[R].DPLDRLSDMLSFVVQSK.[V]	P32386	YBT1	P32386 1xPhospho [S654(100)]	424812	549732	97370.4	600075	801132	610971	70.7932	68.6194	15.937	51.7832	456503	718203	540619	456503	718203	540619	100	100	100	100	1.93113	0.114956
[R].DSAYTLGQLGLVQFR.[D]	P32563	VPH1	P32563 1xPhospho [T32(99)]	0	0	0	5.55391e+08	6.21711e+08	9.08154e+08	0	0	0	0	0	987238	0	6.40632e+08	8.42125e+08	5.08794e+08	0	0.117232	0	0.0390773	*	0.42265
[R].DSSLDLNEVIEEESIYQPK.[E]	P40074	AVT6	P40074 1xPhospho [S344(100)]	6.07927e+06	3.57624e+06	4944633	1.08896e+08	8.70926e+07	7.06172e+07	5.58262	4.10625	7.00202	5.56363	0	862276	0	9.08444e+07	1.4043e+08	9.99038e+07	0	0.614027	0	0.204676	0.0367882	0.00335766
[R].ELIMEEEGTGSDSNR.[S]	Q03730	YML018C	Q03730 1xPhospho [S93(100)]	3.06283e+06	6.26844e+06	2.39273e+06	6.43413e+07	4.44779e+07	2.69097e+07	4.76028	14.0934	8.89169	9.24845	4.03343e+06	1.26504e+06	2.37949e+06	4.31774e+07	4.8777e+07	2.43644e+07	9.34154	2.59352	9.76623	7.23376	0.782159	0.602166
[R].ETSNEASSTNSENVNK.[F]	P32386	YBT1	P32386 2xPhospho [S1516(98.7); S1519(100)]	1.77484e+06	1.53262e+06	4.08057e+06	1.77484e+06	1.53262e+06	4.08057e+06	100	100	100	100	0	0	0	0	0	0	0	0	0	0	**	-
[R].FAVANLSTMSLVNNPALQSR.[K]	P38873	KOG1	P38873 2xPhospho [S491(99.5); S494(100)]	240072	0	0	240072	0	0	100	0	0	33.3333	0	0	948268	0	0	948268	0	0	100	33.3333	1	1
[R].FSIIAGGSPSSSQEAFDSHGNTEHGR.[K]	P20107	ZRC1	P20107 1xPhospho [S393(100)]	2.08275e+07	1.54392e+07	7.78722e+06	8.72301e+08	5.62597e+08	4.80466e+08	2.38765	2.74428	1.62077	2.2509	3.68467e+06	3.90947e+06	6.79854e+06	2.81162e+08	2.17512e+08	4.06695e+08	1.31052	1.79736	1.67166	1.59318	0.707797	0.143723
[R].FSIIAGGSPSSSQEAFDSHGNTEHGR.[K]	P20107	ZRC1	P20107 2xPhospho [S396(100); S397(100)]	4.04085e+06	4.17581e+06	0	8.72301e+08	5.62597e+08	4.80466e+08	0.46324	0.742239	0	0.401827	735937	914697	615946	2.81162e+08	2.17512e+08	4.06695e+08	0.261749	0.420528	0.151452	0.277909	0.691615	0.619518
[R].FTNNDMDSIVVK.[R]	P47082	AVT1	P47082 1xPhospho [S187(100)]	480294	735165	0	5.12358e+07	8.04815e+07	7.37328e+07	0.937419	0.913458	0	0.616959	0	0	0	5.31984e+07	4.51205e+07	3.8355e+07	0	0	0	0	**	0.183611
[R].GLQNSSLPELEDGYAGGYQSLRPSHNLR.[F]	P53273	YGR125W	P53273 1xPhospho [S185(99.4)]	980037	776429	477958	1.06795e+08	7.30983e+07	5.50126e+07	0.917676	1.06217	0.868817	0.949555	0	0	0	2.88764e+07	1.24057e+07	4.8085e+07	0	0	0	0	**	0.0035635
[R].GLVCVENNIGYDLENLSLYR.[K]	P34240	ZRT3	P34240 1xPhospho [S262(100)]	2.49958e+07	1.62159e+07	3.4547e+07	7.41446e+07	7.48011e+07	1.28784e+08	33.7122	21.6787	26.8254	27.4054	6.82164e+06	1.22627e+07	1.66645e+07	4.53589e+07	5.35818e+07	7.39612e+07	15.0393	22.886	22.5315	20.1522	0.735338	0.1687
[R].HDNLSSSSSDIIYGR.[N]	P47818	CCC1	P47818 2xPhospho [S53(99.8); S/Y]	1.61988e+06	1.69916e+06	0	1.28146e+07	8.83588e+06	1.71506e+07	12.6409	19.2302	0	10.6237	0	1.03324e+06	812621	1.65636e+06	4.75218e+06	4.528e+06	0	21.7424	17.9466	13.2297	1.2453	0.780919
[R].HVIADLEDHESSDEEGTALPK.[K]	Q02725	VTC3	Q02725 2xPhospho [S621(100); S622(100)]	5.654e+07	2.73076e+07	1.15189e+06	5.99719e+07	2.87041e+07	1.15189e+06	94.2774	95.1349	100	96.4708	1.00473e+07	5.80158e+06	1.33797e+07	1.00473e+07	5.80158e+06	1.33797e+07	100	100	100	100	1.03658	0.186121
[R].INNDENSSGNEEDEDGNRQEVLDFQDAER.[E]	P27514	PHO91	P27514 1xPhospho [S312(99.4)]	0	0	0	2.54374e+06	1.06461e+07	3.04718e+06	0	0	0	0	1.61484e+06	0	545514	5.71006e+06	4.62174e+06	1.82581e+06	28.2806	0	29.8779	19.3862	*	0.183812
[R].INNDENSSGNEEDEDGNRQEVLDFQDAER.[E]	P27514	PHO91	P27514 2xPhospho [S311(100); S312(100)]	425146	2.84034e+06	114390	2.54374e+06	1.06461e+07	3.04718e+06	16.7134	26.6797	3.75395	15.7157	810345	1.63217e+06	470761	5.71006e+06	4.62174e+06	1.82581e+06	14.1915	35.3151	25.7836	25.0968	1.59692	0.357024
[R].IPDEELHPLSDEGM.[-]	Q05521	DPP1	Q05521 1xPhospho [S285(100)]	6.27524e+07	3.39073e+07	1.35978e+07	1.34428e+08	1.16786e+08	5.39457e+07	46.681	29.0336	25.2064	33.6404	3.50611e+07	4.44906e+07	1.8613e+07	7.71768e+07	9.35412e+07	5.31466e+07	45.4296	47.5626	35.022	42.6714	1.26846	0.304004
[R].ITSQGDLEADGSSDEETEQEPHSK.[R]	P43585	VTC2	P43585 1xPhospho [S616(100)]	2.57159e+06	2.65144e+06	1040223	5.72786e+07	6.96275e+07	1.03282e+07	4.48962	3.80803	10.0717	6.12312	1.11564e+06	0	1.40723e+06	1.34011e+07	1.95061e+07	2.51771e+07	8.32503	0	5.58931	4.63811	0.757475	0.662526
[R].ITSQGDLEADGSSDEETEQEPHSK.[R]	P43585	VTC2	P43585 2xPhospho [S615(100); S616(100)]	5.34309e+07	6.49621e+07	8.74268e+06	5.72786e+07	6.96275e+07	1.03282e+07	93.2826	93.2995	84.6489	90.4103	1.22854e+07	1.89837e+07	2.30813e+07	1.34011e+07	1.95061e+07	2.51771e+07	91.675	97.3216	91.6757	93.5574	1.03481	0.412114
[R].ITSQGDLEADGSSDEETEQEPHSK.[R]	P43585	VTC2	P43585 3xPhospho [S606(99); S615(99); S616(99)]	0	206100	0	5.72786e+07	6.96275e+07	1.03282e+07	0	0.296004	0	0.098668	0	0	0	1.34011e+07	1.95061e+07	2.51771e+07	0	0	0	0	**	0.42265
[R].IYGDNINAQLLK.[H]	P43561	FET5	P43561 1xPhospho [Y391(100)]	2.52396e+07	2.26978e+07	11818237	1.85315e+08	2.48121e+08	1.39735e+08	13.6199	9.14787	8.4576	10.4085	4.14657e+06	4.19207e+06	3.74852e+06	2.53393e+08	2.43809e+08	2.8097e+08	1.63642	1.71941	1.33413	1.56332	0.150197	0.0312513
[R].LIEGDTGSGIIPDEQER.[Q]	Q04991	FMP42	Q04991 1xPhospho [S238(100)]	5.63681e+06	1.34845e+07	5.89219e+06	2.9304e+07	1.14664e+08	5.84835e+07	19.2357	11.76	10.075	13.6902	1.57905e+07	2.59109e+07	3.34579e+06	1.52481e+08	2.22858e+08	3.77247e+07	10.3558	11.6267	8.86895	10.2838	0.75118	0.309759
[R].LLGVATSDNSSTTEVQGR.[T]	P32912	VAM7	P32912 1xPhospho [S233(99.6)]	1.00373e+06	651653	706956	3.67576e+07	3.38166e+07	2.97703e+07	2.73067	1.92702	2.3747	2.34413	567318	503889	0	4.0446e+07	7.19054e+07	2.75473e+07	1.40265	0.700766	0	0.70114	0.299105	0.0242524
[R].LLLSPASSNVDDDRNR.[G]	P53273	YGR125W	P53273 2xPhospho [S152(100); S153(100)]	1.33683e+06	1.49699e+06	0	5.15712e+07	3.05863e+07	2.05619e+07	2.59219	4.89431	0	2.4955	705657	2.38707e+06	1.4024e+06	1.01828e+07	1.41489e+07	9.49259e+06	6.92986	16.871	14.7736	12.8582	5.15254	0.036066
[R].LLTPENASK.[T]	P32798	COT1	P32798 1xPhospho [T206(100)]	0	0	0	6.48287e+07	5.9128e+07	8.98333e+07	0	0	0	0	840188	373956	0	1.22403e+08	1.51855e+08	1.11291e+08	0.686409	0.246259	0	0.310889	*	0.195253
[R].LVPGSDSSSRPK.[K]	P11491	PHO8	P11491 1xPhospho [S17(99.7)]	3.70477e+06	2.68347e+06	2.23885e+06	2.20169e+08	2.96563e+08	4.03e+06	1.6827	0.904857	55.5546	19.3807	1.93736e+06	5.435e+06	1.3191e+06	3.36627e+08	8.52585e+08	2.91648e+08	0.575522	0.637473	0.452293	0.555096	0.0286417	0.407387
[R].NFSSEELSQK.[L]	P39109	YCF1	P39109 1xPhospho [S251(99.6)]	4.86819e+06	3.74362e+06	1.87999e+06	2.86124e+08	3.38309e+08	3.89695e+08	1.70143	1.10657	0.482425	1.09681	3.13527e+06	2.92066e+06	2.5355e+06	3.60429e+08	3.74823e+08	2.63445e+08	0.869872	0.779212	0.962439	0.870507	0.793675	0.558993
[R].NISDLEAGTDTNDIDNTIHQTTFTSSDGTTQR.[E]	P25371	ADP1	P25371 1xPhospho [S659(100)]	807798	0	515006	2.05725e+07	1.74235e+07	1.79075e+07	3.92659	0	2.87592	2.26751	670126	899606	843801	7.41252e+06	1.34482e+07	9.28244e+06	9.04047	6.68942	9.09029	8.27339	3.64867	0.0132896
[R].NQSVEDLSFLEQGYQHR.[Y]	P37296	STV1	P37296 1xPhospho [S223(100)]	7.43597e+06	3.78675e+06	0	9.4544e+06	5.4862e+06	1.09217e+07	78.6509	69.0232	0	49.2247	1.8354e+06	1.98245e+06	1.69044e+06	1.8354e+06	4.21471e+06	4.48986e+06	100	47.0365	37.6502	61.5622	1.25064	0.714938
[R].NSAQDLENSPMSVGK.[D]	P47818	CCC1	P47818 2xPhospho [S68(100); S71(100)]	3.09014e+06	2.99547e+06	518541	3.03366e+08	2.9534e+08	1.8153e+08	1.01862	1.01424	0.28565	0.772837	2.49228e+06	4.78448e+06	2.88833e+06	1.52946e+08	2.41237e+08	1.30962e+08	1.62952	1.98331	2.20547	1.93943	2.5095	0.0166929
[R].NSAQDLENSPMSVGK.[D]	P47818	CCC1	P47818 1xPhospho [S71(100)]	8.93505e+06	8.10718e+06	4.38357e+06	3.03366e+08	2.9534e+08	1.8153e+08	2.94531	2.74503	2.41479	2.70171	9.53652e+06	8.05406e+06	6.6801e+06	1.52946e+08	2.41237e+08	1.30962e+08	6.23524	3.33865	5.10079	4.89156	1.81054	0.0631636
[R].NSSSLDSDHDAYYSK.[Q]	P53388	DIP5	P53388 1xPhospho [S22(100)]	839028	335235	0	2.9632e+06	1.20436e+06	359416	28.315	27.835	0	18.7167	0	0	0	1.51206e+06	1.05179e+06	1.63539e+06	0	0	0	0	**	0.183532
[R].QSLIAIEREEDSIPSRPQR.[R]	Q04991	FMP42	Q04991 1xPhospho [S259(100)]	1.38852e+06	1.66211e+06	1.17207e+06	1.57174e+08	1.3444e+08	1.31402e+08	0.883426	1.23632	0.891971	1.00391	1.45037e+06	0	1.01294e+06	1.13462e+08	1.28131e+08	7.22275e+07	1.27828	0	1.40242	0.893568	0.890091	0.832033
[R].RASDATLGSIDFGDDENIAK.[R]	P39109	YCF1	P39109 3xPhospho [S908(100); T911(100); S914(100)]	4.00188e+06	1.74884e+07	0	4.77187e+06	1.97078e+07	533100	83.864	88.7384	0	57.5341	2.5611e+06	3.10815e+06	3.14448e+06	2.91526e+06	3.5672e+06	3.14448e+06	87.8517	87.1315	100	91.6611	1.59316	0.357537
[R].RASDATLGSIDFGDDENIAK.[R]	P39109	YCF1	P39109 2xPhospho [S908(100); T/S]	769989	2.21942e+06	533100	4.77187e+06	1.97078e+07	533100	16.136	11.2616	100	42.4659	354154	459045	0	2.91526e+06	3.5672e+06	3.14448e+06	12.1483	12.8685	0	8.33893	0.196368	0.357537
[R].RFSIIAGGSPSSSQEAFDSHGNTEHGR.[K]	P20107	ZRC1	P20107 1xPhospho [S387(100)]	6.6809e+06	9.28303e+06	0	5.41462e+07	4.59785e+07	1.55796e+07	12.3386	20.1899	0	10.8429	1.71631e+06	0	5.01526e+06	2.20257e+07	5.44982e+06	2.96228e+07	7.79231	0	16.9304	8.24091	0.760031	0.750632
[R].RISQTYFNYQATPECQK.[V]	P38329	VHC1	P38329 1xPhospho [S34(100)]	7.03355e+06	4.85756e+06	2.60456e+06	1.68995e+07	7.50845e+06	4.93208e+06	41.6198	64.6946	52.8086	53.041	3.10318e+06	4.4614e+06	7.07584e+06	5.69683e+06	7.07613e+06	1.13285e+07	54.472	63.0486	62.4604	59.9937	1.13108	0.38961
[R].RKSEGECCDLNK.[C]	P34240	ZRT3	P34240 1xPhospho [S188(100)]	0	443304	2539.77	0	443304	2539.77	0	100	100	66.6667	0	5.79964e+06	2.55187e+06	0	8.81415e+06	2.68756e+06	0	65.7991	94.9512	53.5834	0.803752	0.778997
[R].RPSNTFNLDADR.[I]	P27514	PHO91	P27514 1xPhospho [S295(99.7)]	5.29074e+06	8.59129e+06	3.13982e+06	1.59568e+07	3.0008e+07	3.59877e+06	33.1565	28.63	87.2471	49.6779	4.5964e+06	5.40245e+06	1.79329e+06	2.01083e+07	1.74671e+07	9.27211e+06	22.8582	30.9292	19.3407	24.376	0.490682	0.310126
[R].RPSNTFNLDADRINNDENSSGNEEDEDGNRQEVLDFQDAER.[E]	P27514	PHO91	P27514 3xPhospho [S295(98.9); S311(100); S312(100)]	571113	2.1866e+06	0	1.59568e+07	3.0008e+07	3.59877e+06	3.57911	7.28671	0	3.62194	0	0	404915	2.01083e+07	1.74671e+07	9.27211e+06	0	0	4.36702	1.45567	0.401904	0.444935
[R].SPTAYGATTASSNCIVDDAVNCNTSNCL.[-]	P20107	ZRC1	P20107 1xPhospho [T423(97.1)]	0	0	162230	4.69505e+07	2.49782e+07	2.34328e+07	0	0	0.692321	0.230774	0	0	0	2.7019e+06	8.69203e+06	1.27401e+07	0	0	0	0	**	0.42265
[R].SQYGSGSPTPTHR.[S]	P53925	YNL115C	P53925 1xPhospho [S244(100)]	1.52207e+06	3.8383e+06	783937	4.92144e+07	7.96516e+07	1.42351e+06	3.09272	4.81885	55.0709	20.9942	9.75473e+06	2.39497e+07	1.27802e+07	1.18943e+08	3.45477e+08	1.53722e+08	8.20119	6.93237	8.31384	7.8158	0.372285	0.520304
[R].SQYGSGSPTPTHR.[S]	P53925	YNL115C	P53925 2xPhospho [S242(100); S244(99.6)]	412485	493004	149400	4.92144e+07	7.96516e+07	1.42351e+06	0.838139	0.61895	10.4952	3.98411	553103	642532	407843	1.18943e+08	3.45477e+08	1.53722e+08	0.465015	0.185984	0.265312	0.305437	0.0766638	0.376182
[R].SSDSLVTDSAAGATAFACALK.[S]	P11491	PHO8	P11491 1xPhospho [S123(100)]	1.76904e+07	1.48461e+07	1.37245e+07	2.40868e+08	1.94481e+08	3.3809e+08	7.34441	7.63373	4.05943	6.34585	1.36875e+07	1.10578e+07	1.64131e+07	1.12771e+08	1.28589e+08	1.37981e+08	12.1375	8.59927	11.8952	10.8773	1.71408	0.0485367
[R].SSVDSWSERNESDFVEALDK.[E]	Q02725	VTC3	Q02725 1xPhospho [S43(98.8)]	1.54686e+06	790254	309676	5.94738e+07	1.6734e+07	1.79996e+07	2.60091	4.72243	1.72046	3.0146	0	0	0	8.68028e+06	1.34004e+07	8.95027e+06	0	0	0	0	**	0.0773127
[R].TIEENIDEEYSDEYSR.[L]	P53273	YGR125W	P53273 1xPhospho [S140(100)]	2.98496e+06	2.24898e+06	1.44974e+06	1.56491e+07	6.82265e+06	4.89216e+06	19.0743	32.9635	29.634	27.2239	1.16194e+06	1.8876e+06	1.09184e+06	2.51236e+06	3.6837e+06	2.71581e+06	46.2489	51.242	40.2029	45.898	1.68594	0.0238524
[R].TLGAGSANGPAVNEGRDIESDGFIK.[D]	P53925	YNL115C	P53925 1xPhospho [S56(100)]	2.6021e+06	1.76872e+06	989366	2.20715e+08	2.41249e+08	1.91094e+08	1.17894	0.733152	0.517739	0.809945	3.20485e+06	2.11556e+06	2.67465e+06	4.01878e+08	4.71074e+08	2.49915e+08	0.797468	0.449093	1.07022	0.772261	0.953473	0.896555
[R].TNTFTLLTSPDSAK.[I]	Q02205	MEH1	Q02205 1xPhospho [S146(99.5)]	1.28978e+06	738357	1.91192e+06	1.70891e+07	8.9658e+06	3.38671e+07	7.5474	8.23527	5.64535	7.14267	0	246659	0	1.88693e+07	1.43435e+07	6.72744e+06	0	1.71966	0	0.573219	0.0802528	0.00241372
[R].TRQIDGASSPSSNEDALESDNNEK.[G]	Q06451	TPO3	Q06451 1xPhospho [S132(100)]	1.07207e+07	1.10114e+07	840310	1.49416e+07	1.49468e+07	1.19462e+06	71.7507	73.6709	70.3412	71.9209	1.53555e+06	404877	1.65766e+06	4.13712e+06	1.72599e+06	4.97356e+06	37.1163	23.4577	33.3294	31.3011	0.435216	0.000630489
[R].TRSSDSLVTDSAAGATAFACALK.[S]	P11491	PHO8	P11491 1xPhospho [S123(100)]	750898	0	103728	5.46376e+06	0	1.09081e+06	13.7432	0	9.50926	7.75084	7.01116e+06	0	951689	7.01116e+06	4.48207e+06	2.1684e+06	100	0	43.889	47.963	6.18811	0.240814
[R].TSNQIALGNDKIEEINENSPLLSAPSK.[Q]	Q04602	VBA4	Q04602 1xPhospho [S62(100)]	339651	0	0	4.70793e+07	6.01097e+07	3.63349e+07	0.721445	0	0	0.240482	0	0	0	2.46943e+07	5.59176e+07	9.22109e+07	0	0	0	0	**	0.42265
[R].VTPRPSLEADRASVEIIDAN.[-]	P42836	PFA3	P42836 1xPhospho [S329(100)]	2.2948e+06	873515	542105	3.68276e+06	2.29364e+06	2.21835e+06	62.3118	38.0843	24.4373	41.6112	0	259985	0	1.29825e+06	2.29148e+06	0	0	11.3457	0	3.7819	0.0908868	0.0319012
[R].YSHLSSSDDNYGSLA.[-]	P56508	SNA2	P56508 1xPhospho [S70(99)]	5.69596e+07	5.84446e+07	2.29682e+07	2.83175e+08	3.2985e+08	2.46399e+08	20.1146	17.7186	9.32155	15.7182	2.36785e+07	3.27804e+07	3.00078e+07	1.97539e+08	2.14058e+08	2.72072e+08	11.9868	15.3138	11.0294	12.7766	0.812855	0.450509
