# Supplementary material for: Iron Limitation Restores Autophagy and Increases Lifespan in the Yeast Model of Niemann–Pick Type C1
Source: Int J Mol Sci. 2023 Mar 25;24(7):6221. doi: 10.3390/ijms24076221 (PMC10094029; doi:10.3390/ijms24076221)
Supplement: Supplementary file 1 [file ijms-24-06221-s001.zip › Table S3.xlsx]

## Sheet: Table S3 - Gene ontology 
Gene Ontology (GO) enrichment analysis on biological processes
GO Biological process	Protein name	Description	Ratio protein abundance (ncr1∆/wt)	Phosphosite	phosphorylation % (wt)	phosphorylation % (ncr1∆)	Fold enrichment	P value
Vesicle fusion with the vacuole	VPS33	ATP-binding protein that is a subunit of the HOPS and CORVET complexes	2.93168				> 100	5.43E-04
	VAM3	Syntaxin-like vacuolar t-SNARE	0.380082
Vesicle fusion	VPS33	ATP-binding protein that is a subunit of the HOPS and CORVET complexes	2.93168				13.98	7.16E-06
	SEC17	Alpha-SNAP cochaperone; SNARE-complex adaptor for Sec18 (NSF)	1.85017
	PEP12	Target membrane receptor (t-SNARE)	0.316047
	VAM3	Syntaxin-like vacuolar t-SNARE	0.380082
	NYV1	v-SNARE component of the vacuolar SNARE complex; involved in vesicle fusion; inhibits ATP-dependent Ca(2+) transport activity of Pmc1p	0.405569
	VAM7	v-SNARE protein; functions with Vam3p in vacuolar protein trafficking		S233	2.34413	0.70114
Vesicle-mediated transport	VPS33	ATP-binding protein that is a subunit of the HOPS and CORVET complexes	2.93168				3.54	1.53E-05
	SSA1	ATPase involved in protein folding, nuclear import, stress granule disassembly, and clathrin coat disassembly; (localizes to many places in the cell)	2.48298
	FTH1	High affinity iron transporter; involved in transport of intravacuolar stores of iron; indirect role in endocytosis	2.05855	S453	0.588248	3.64511
	SEC17	Alpha-SNAP cochaperone; SNARE-complex adaptor for Sec18 (NSF)	1.85017
	VPS30	Subunit of phosphatidylinositol (PtdIns) 3-kinase complexes I and II; Complex I is essential in autophagy, Complex II is required for vacuolar protein sorting;	1.58871
	EMP70	Role in endosome-to-vacuole sorting	0.308727
	PEP12	Target membrane receptor (t-SNARE)	0.316047
	VAM3	Syntaxin-like vacuolar t-SNARE	0.380082
	YCK3	Palmitoylated vacuolar membrane-localized casein kinase I isoform	0.401973	S48	27.7229	0
	NYV1	v-SNARE component of the vacuolar SNARE complex; involved in vesicle fusion; inhibits ATP-dependent Ca(2+) transport activity of Pmc1p	0.405569
	MYO2	Type V myosin motor involved in actin-based transport of cargos	0.491274
	PEP8	Endosomal retromer complex subunit involved in retrograde transport	0.668904
	YPT52	Endosomal Rab family GTPase	0.692752
	MEH1	Subunit of the EGO/GSE complex		S146	7.14267	0.573219
	VAM7	v-SNARE protein; functions with Vam3p in vacuolar protein trafficking		S233	2.34413	0.70114
Vesicle organization	VPS33	ATP-binding protein that is a subunit of the HOPS and CORVET complexes	2.93168				8.73	5.03E-06
	SEC17	Alpha-SNAP cochaperone; SNARE-complex adaptor for Sec18 (NSF)	1.85017
	LSB6	Type II phosphatidylinositol 4-kinase	1.44196
	PEP12	Target membrane receptor (t-SNARE)	0.316047
	VAM3	Syntaxin-like vacuolar t-SNARE	0.380082
	NYV1	v-SNARE component of the vacuolar SNARE complex; involved in vesicle fusion; inhibits ATP-dependent Ca(2+) transport activity of Pmc1p	0.405569
	YPT52	Endosomal Rab family GTPase	0.692752
	VAM7	v-SNARE protein; functions with Vam3p in vacuolar protein trafficking		S233	2.34413	0.70114
Vacuole fusion	IVY1	Phospholipid-binding protein that interacts with both Ypt7p and Vps33p	5.15013				26.37	2.12E-10
	VPS33	ATP-binding protein that is a subunit of the HOPS and CORVET complexes	2.93168
	SEC17	Alpha-SNAP cochaperone; SNARE-complex adaptor for Sec18 (NSF)	1.85017
	VAM3	Syntaxin-like vacuolar t-SNARE	0.380082
	NYV1	v-SNARE component of the vacuolar SNARE complex; involved in vesicle fusion; inhibits ATP-dependent Ca(2+) transport activity of Pmc1p	0.405569
	VTC5	Subunit of the vacuolar transporter chaperone (VTC) complex	0.463708
	PFA3	Palmitoyltransferase for Vac8p		S329	41.6112	3.7819
	VTC3	Regulatory subunit of the vacuolar transporter chaperone (VTC) complex; (VTC complexes containing Vtc3 are mainly found on vacuoles)		S274	4.99027	2.27812
	VAM7	v-SNARE protein; functions with Vam3p in vacuolar protein trafficking		S233	2.34413	0.70114
Vacuole organization	IVY1	Phospholipid-binding protein that interacts with both Ypt7p and Vps33p	5.15013				14.65	9.94E-12
	VPS33	ATP-binding protein that is a subunit of the HOPS and CORVET complexes	2.93168
	SEC17	Alpha-SNAP cochaperone; SNARE-complex adaptor for Sec18 (NSF)	1.85017
	VPS30	Subunit of phosphatidylinositol (PtdIns) 3-kinase complexes I and II; Complex I is essential in autophagy, Complex II is required for vacuolar protein sorting	1.58871
	PEP12	Target membrane receptor (t-SNARE)	0.316047
	VAM3	Syntaxin-like vacuolar t-SNARE	0.380082
	NYV1	v-SNARE component of the vacuolar SNARE complex; involved in vesicle fusion; inhibits ATP-dependent Ca(2+) transport activity of Pmc1p	0.405569
	VTC5	Subunit of the vacuolar transporter chaperone (VTC) complex	0.463708
	MYO2	Type V myosin motor involved in actin-based transport of cargos	0.491274
	MEH1	Subunit of the EGO/GSE complex		S146	7.14267	0.573219
	PFA3	Palmitoyltransferase for Vac8p		S329	41.6112	3.7819
	VTC3	Regulatory subunit of the vacuolar transporter chaperone (VTC) complex		S274	4.99027	2.27812
	VAM7	v-SNARE protein; functions with Vam3p in vacuolar protein trafficking		S233	2.34413	0.70114
Vacuolar transmembrane transport	VHC1	Vacuolar potassium:chloride symporter; localizes to vCLAMPs	2.3945				45.57	5.26E-06
	ATG22	Vacuolar integral membrane protein required for efflux of amino acids during autophagic body breakdown in the vacuole	1.31489
	AVT6	Vacuolar aspartate and glutamate exporter		S344	5.56363	0.2
	YGR125W	Vacuolar uptake and storage of arginine; member of the APC (amino acid-polyamine-organocation) transporter superfamily 1		S185	0.9	0
				S152; S153	2.5	12.8582
				S140	27.2	45.898
Iron import into cell	ENB1	ENB1/ARN4 - Ferric enterobactin transmembrane transporter	4.02079				43.95	9.79E-05
	FRE8	Putative ferric-chelate reductase	1.7653
	FET5	Ferroxidase involved in iron transport	1.55961	Y391	10.4085	1.56332
Iron ion homeostasis	ENB1	ENB1/ARN4 - Ferric enterobactin transmembrane transporter	4.02079				10.09	3.96E-05
	SMF3	Metal ion transmembrane transporter involved in iron ion transport	2.29974
	FTH1	High affinity iron transporter; involved in transport of intravacuolar stores of iron; indirect role in endocytosis	2.05855	S453	0.588248	3.64511
	FRE8	Putative ferric-chelate reductase	1.7653
	FET5	Ferroxidase involved in iron transport	1.55961	Y391	10.4085	1.56332
	CCC1	Vacuolar Fe2+/Mn2+ transporter		T32	2.60627	4.77112
				S68 ; S71	0.772837	1.93943
Manganese ion homeostasis	SMF3	Metal ion transmembrane transporter involved in iron ion transport	2.29974				30.76	2.29E-04
	CCC1	Vacuolar Fe2+/Mn2+ transporter		T32	2.60627	4.77112
				S68 ; S71	0.772837	1.93943
	MAM3	Required for Mg2+ sequestration in vacuole		S439	4.40171	10.1043
Calcium ion transport	VHC1	Vacuolar potassium:chloride symporter; localizes to vCLAMPs	2.3945				27.34	2.73E-05
	PMC1	Vacuolar Ca2+ ATPase involved in depleting cytosol of Ca2+ ions	1.21536
	YBT1	Transporter of the ATP-binding cassette (ABC) family; negative regulator of vacuole fusion; regulates release of lumenal Ca2+ stores	0.778578	S654	51.7832	100
				S1516 ; S1519	100	0
	VCX1	Vacuolar membrane antiporter with Ca2+/H+ and K+/H+ exchange activity (transports calcium into the vacuole)		S13	4.81282	1.43019
Calcium ion homeostasis	VMA2	V-type proton ATPase subunit B; Subunit B of V1 peripheral membrane domain of vacuolar H+-ATPase	2.22882				22.79	5.04E-05
	PMC1	Vacuolar Ca2+ ATPase involved in depleting cytosol of Ca2+ ions	1.21536
	CCC1	Vacuolar Fe2+/Mn2+ transporter		T32	2.60627	4.77112
				S68 ; S71	0.772837	1.93943
	VCX1	Vacuolar membrane antiporter with Ca2+/H+ and K+/H+ exchange activity (transports calcium into the vacuole)		S13	4.81282	1.43019
Polyphosphate metabolic process	VTC5	Subunit of the vacuolar transporter chaperone (VTC) complex	0.463708				21.97	5.29E-04
	VTC3	Regulatory subunit of the vacuolar transporter chaperone (VTC) complex		S274	4.99027	2.27812
	VPH1	Subunit a of the vacuolar-ATPase V0 domain		S160	2.31813	0.048727
Vesicle docking	VPS33	ATP-binding protein that is a subunit of the HOPS and CORVET complexes	2.93168				17.09	1.84E-05
	PEP12	Target membrane receptor (t-SNARE)	0.316047
	VAM3	Syntaxin-like vacuolar t-SNARE	0.380082
	MYO2	Type V myosin motor involved in actin-based transport of cargos	0.491274
	VAM7	v-SNARE protein; functions with Vam3p in vacuolar protein trafficking		S233	2.34413	0.70114
Golgi organization	SEC17	Alpha-SNAP cochaperone; SNARE-complex adaptor for Sec18 (NSF)	1.85017				11.72	5.02E-04
	LSB6	Type II phosphatidylinositol 4-kinase	1.44196
	YPT10	Rab family GTP-binding protein	1.3916
	MYO2	Type V myosin motor involved in actin-based transport of cargos	0.491274
Autophagy	VPS33	ATP-binding protein that is a subunit of the HOPS and CORVET complexes	2.93168				6.65	2.68E-07
	SLM4		2.33871
	VMA2	V-type proton ATPase subunit B; Subunit B of V1 peripheral membrane domain of vacuolar H+-ATPase	2.22882
	SEC17	Alpha-SNAP cochaperone; SNARE-complex adaptor for Sec18 (NSF)	1.85017
	VPS30	Subunit of phosphatidylinositol (PtdIns) 3-kinase complexes I and II; Complex I is essential in autophagy, Complex II is required for vacuolar protein sorting	1.58871
	ATG22	Vacuolar integral membrane protein required for efflux of amino acids during autophagic body breakdown in the vacuole	1.31489
	PEP12	Target membrane receptor (t-SNARE)	0.316047
	VAM3	Syntaxin-like vacuolar t-SNARE	0.380082
	MEH1	Subunit of the EGO/GSE complex		S146	7.14267	0.573219
	VTC3	Regulatory subunit of the vacuolar transporter chaperone (VTC) complex		S274	4.99027	2.27812
	VTC5	Subunit of the vacuolar transporter chaperone (VTC) complex	0.463708
	VAM7	v-SNARE protein; functions with Vam3p in vacuolar protein trafficking		S233	2.34413	0.70114
Lysosomal microautophagy	VPS33	ATP-binding protein that is a subunit of the HOPS and CORVET complexes	2.93168				14.65	1.35E-07
	SLM4		2.33871
	VPS30	Subunit of phosphatidylinositol (PtdIns) 3-kinase complexes I and II; Complex I is essential in autophagy, Complex II is required for vacuolar protein sorting	1.58871
	VTC5	Subunit of the vacuolar transporter chaperone (VTC) complex	0.463708
	VAM3	Syntaxin-like vacuolar t-SNARE	0.380082
	MEH1	Subunit of the EGO/GSE complex		S146	7.14267	0.573219
	VTC3	Regulatory subunit of the vacuolar transporter chaperone (VTC) complex		S274	4.99027	2.27812
	VAM7	v-SNARE protein; functions with Vam3p in vacuolar protein trafficking		S233	2.34413	0.70114
Protein targeting to vacuole	VPS33	ATP-binding protein that is a subunit of the HOPS and CORVET complexes	2.93168				5.97	5.87E-04
	VPS30	Subunit of phosphatidylinositol (PtdIns) 3-kinase complexes I and II; Complex I is essential in autophagy, Complex II is required for vacuolar protein sorting	1.58871
	YPT52	Endosomal Rab family GTPase	0.692752
	PEP12	Target membrane receptor (t-SNARE)	0.316047
	VPS73	Putative transmembrane transporter involved in vacuolar protein targeting	0.102822
	VAM7	v-SNARE protein; functions with Vam3p in vacuolar protein trafficking		S233	2.34413	0.70114
